# Supplementary material for: Ag-doped nano magnetic γ-Fe2O3@DA core–shell hollow spheres: an efficient and recoverable heterogeneous catalyst for A3and KA2coupling reactions and [3 + 2] cycloaddition
Source: Royal Society of Chemistry journal article supplement (doi:10.1039/c6ra18810a), 2016-01-01
Supplement: c6ra18810a1.pdf [file c6ra18810a1.pdf]

## Supporting information

### **Ag-doped Nano Magnetic $\gamma$ -Fe<sub>2</sub>O<sub>3</sub>@DA Core–Shell Hollow Spheres: an efficient and recoverable heterogeneous catalyst for A<sup>3</sup>, KA<sup>2</sup> Coupling Reactions and [2+3] cycloaddition**

A. Elhampour<sup>\*,a</sup>, M. Malmir<sup>\*,b</sup>, E. Kowsari, F. Boorboor ajdari and F. Nemati

<sup>a</sup> *Department of Chemistry, Semnan University, Semnan, Iran, Zip Code: 35131-19111, E-mail: Elhampour\_ali@yahoo.com*

<sup>b</sup> *Department of Chemistry, Amirkabir University of Technology, Hafez Avenue, No. 424, Tehran, Iran, E-mail address: Masi.malmir@yahoo.com*

|                                                                           |         |
|---------------------------------------------------------------------------|---------|
| 1. General information                                                    | S3      |
| 1.1. General details                                                      | S3      |
| 2. Characterizations of Catalyst                                          | S4      |
| 2.1. FT-IR analysis                                                       | S4      |
| 2.2. XRD patterns                                                         | S5      |
| 2.3. TGA analysis                                                         | S5      |
| 2.4. VSM Curves                                                           | S6      |
| 2.5. FEG-SEM-EDS analysis                                                 | S6      |
| 2.6. TEM image                                                            | S7      |
| 3. Spectral data for selected compounds                                   | S8-S15  |
| 3.1. Copies of $^1\text{H}$ and $^{13}\text{C}$ NMR for selected products | S16-S55 |
| 4. Reference                                                              | S56     |

## 1. General information

The process for the preparation of the magnetic  $\text{Fe}_2\text{O}_3@\text{DA}/\text{Ag}$  hollow sphere catalyst is schematically described in scheme 1. The nano magnetic  $\text{Fe}_2\text{O}_3@\text{DA}/\text{Ag}$  hollow sphere was prepared from commercially inexpensive available materials and fully characterized using, the corresponding data, provided by FT-IR, FE-SEM, TEM, XRD, TGA, and VSM techniques.

### 1.1. General details

All chemicals, including  $\text{FeCl}_3 \cdot 6\text{H}_2\text{O}$ , trisodium citrate dihydrate, sodium acetate trihydrate, ethanol, ethylene glycol (EG), PVP, urea, dopamine,  $\text{AgNO}_3$  and  $\text{NH}_3 \cdot \text{H}_2\text{O}$ , were analytical grade reagents, purchased from Sigma-Aldrich, and used without further purification. The progress of reaction was monitored by TLC on commercial aluminum-backed plates of silica gel 60 F254, visualized, using ultraviolet light. Melting points were determined in open capillaries using an Electrothermal 9100 without further corrections.  $^1\text{H}$  NMR and  $^{13}\text{C}$  NMR spectra were recorded using a Bruker DRX-400 spectrometer at 400 and 100 MHz respectively. magnetic- $\text{Fe}_2\text{O}_3@\text{DA}/\text{Ag}$  hollow sphere was characterized by; FT-IR spectra were obtained with potassium bromide pellets in the range of  $400\text{--}4000\text{ cm}^{-1}$  using a Shimadzu 8400s spectrometer; X-ray diffraction (XRD) was detected by Philips using Cu-K $\alpha$  radiation of wavelength  $1.54\text{\AA}$ ; Scanning electron Microscopy, FE-SEM-EDX, analysis was performed using Tescanvega II XMU Digital Scanning Microscope. Samples were coated with gold at 10 mA for 2 min prior to analysis; the magnetic properties were characterized using a vibrating sample magnetometer (VSM, Lakeshore7407) at room temperature. Thermo-gravimetric

analyses (TGA) were analyzed with a LINSEIS modele STS PT 16000 thermal analyzer under air atmosphere at a heating rate of 5 °C min<sup>-1</sup>.

## 2. Characterizations of Catalyst

### 2.1. FT-IR analysis

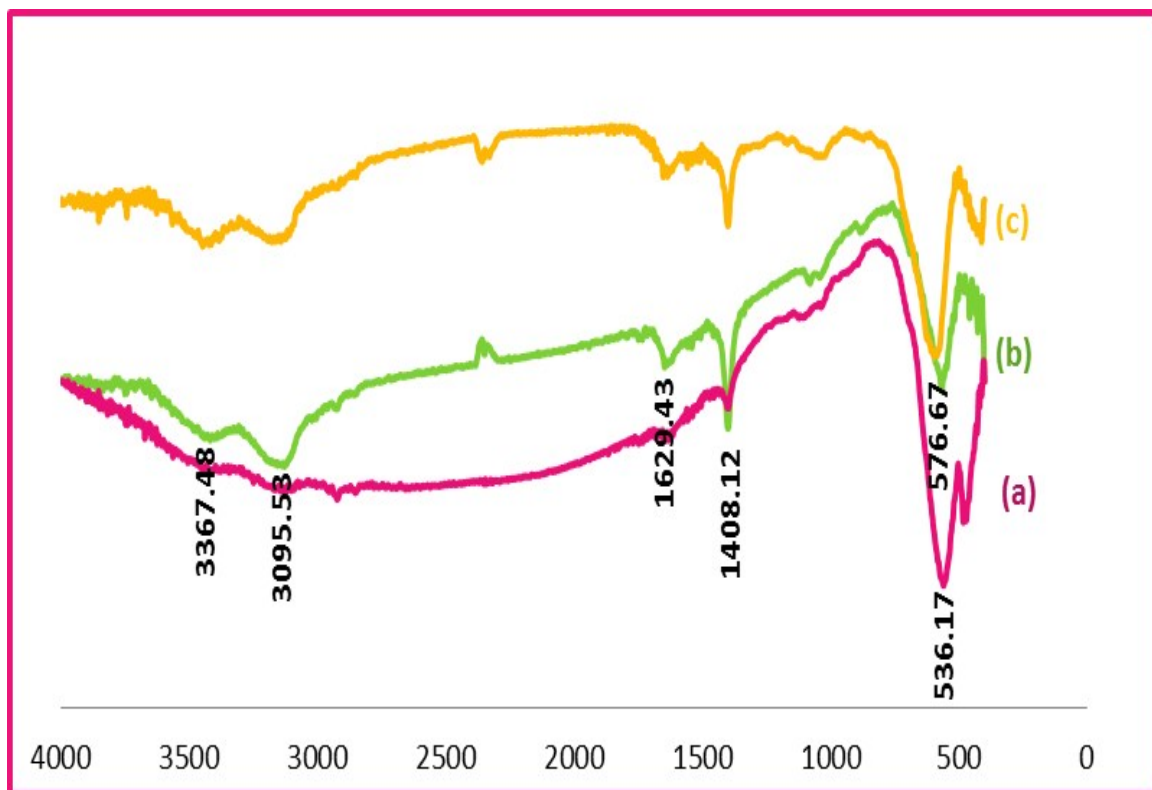

**Figure 1.** The FT-IR spectra of (a) h-Fe<sub>2</sub>O<sub>3</sub>, (b) h-Fe<sub>2</sub>O<sub>3</sub>@DA and (c) h-Fe<sub>2</sub>O<sub>3</sub>@DA/Ag.

## 2.2. X-ray diffraction spectra

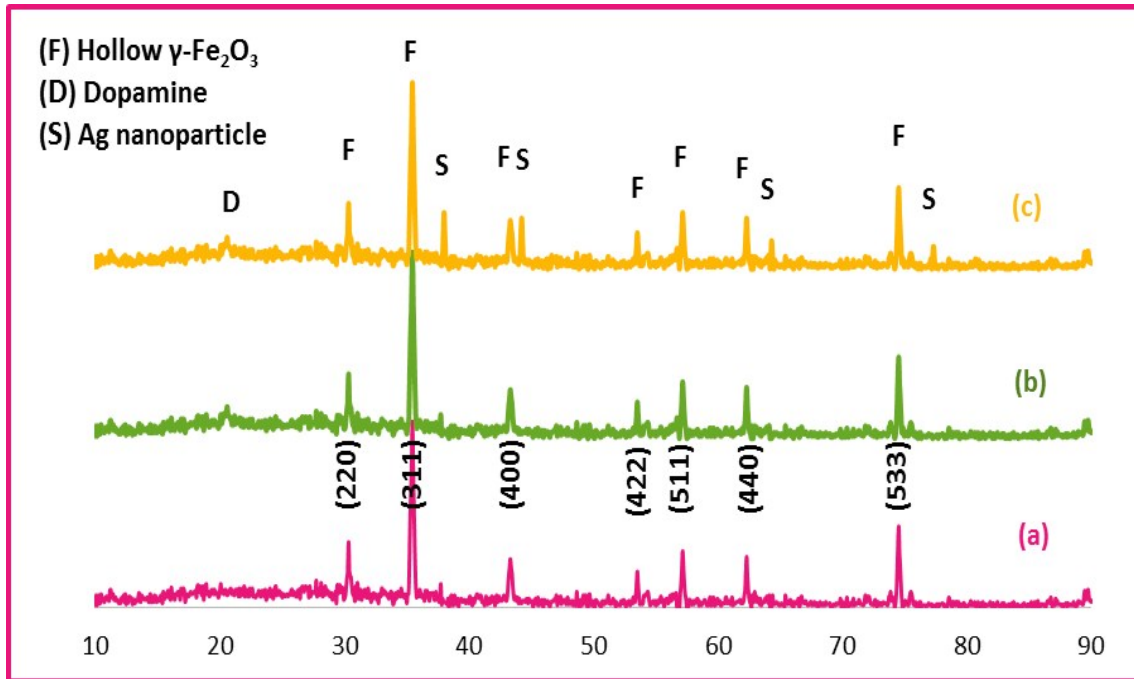

Figure 2. XRD pattern of (a)  $\text{h-Fe}_2\text{O}_3$ , (b)  $\text{h-Fe}_2\text{O}_3@DA$  and (c)  $\text{h-Fe}_2\text{O}_3@DA/Ag$

## 2.3. X-ray diffraction spectra

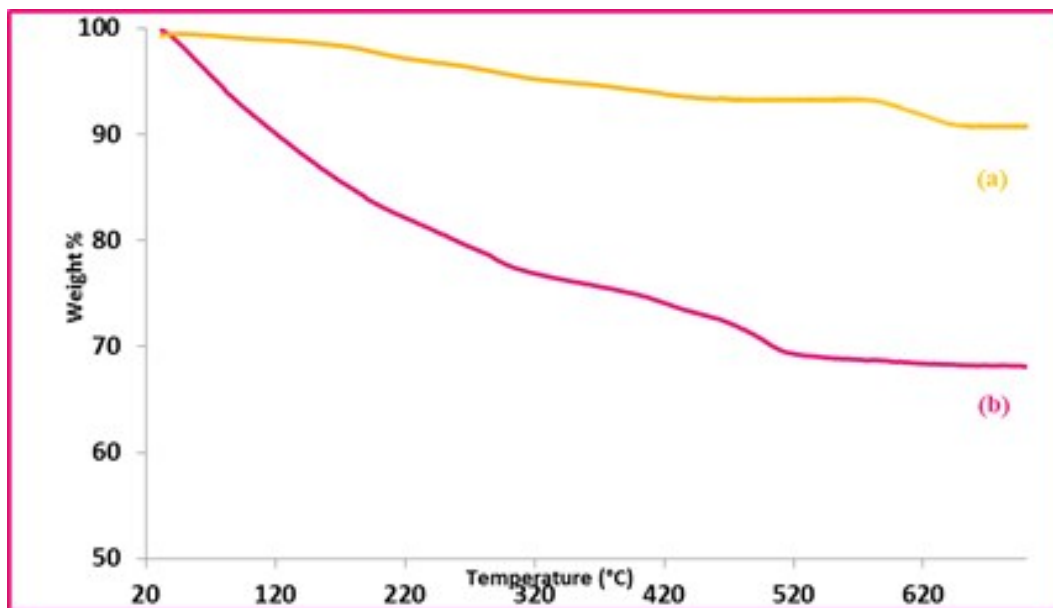

Figure 3. TGA analysis of (a)  $\text{h-Fe}_2\text{O}_3$  and (b)  $\text{h-Fe}_2\text{O}_3@DA/Ag$ .

## 2.4. VSM analysis

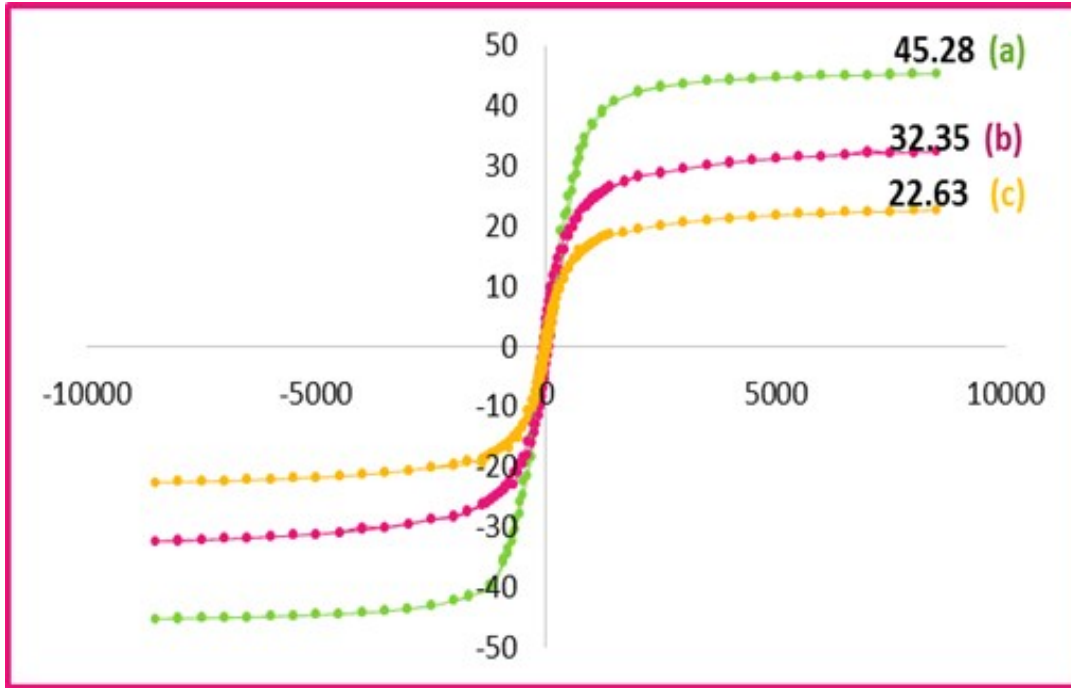

Figure 4. The magnetization curves of (a) h-Fe<sub>2</sub>O<sub>3</sub>, (b) h-Fe<sub>2</sub>O<sub>3</sub>@DA and (c) h-Fe<sub>2</sub>O<sub>3</sub>@DA/Ag.

## 2.5. FE-SEM-EDS analysis

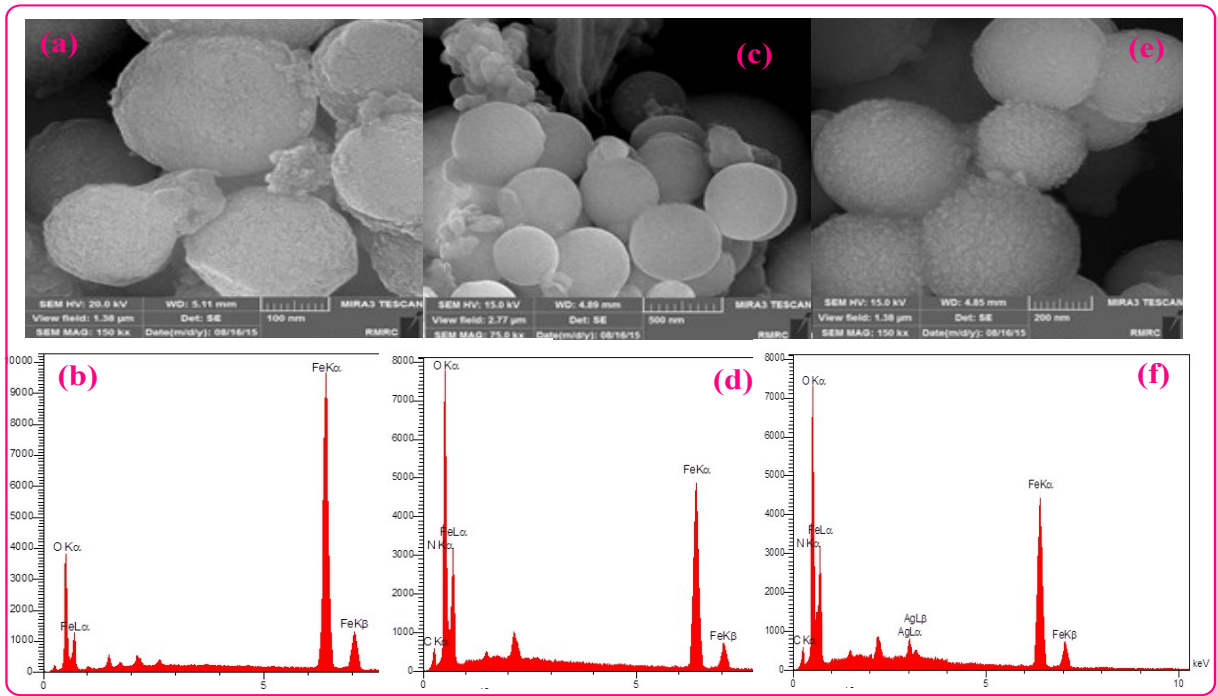

Figure 5. The FEG-SEM-EDS analysis of (a,b) h-Fe<sub>2</sub>O<sub>3</sub>, (c,d) h-Fe<sub>2</sub>O<sub>3</sub>@DA and (e,f) h-Fe<sub>2</sub>O<sub>3</sub>@DA/Ag.

2.6. TEM image

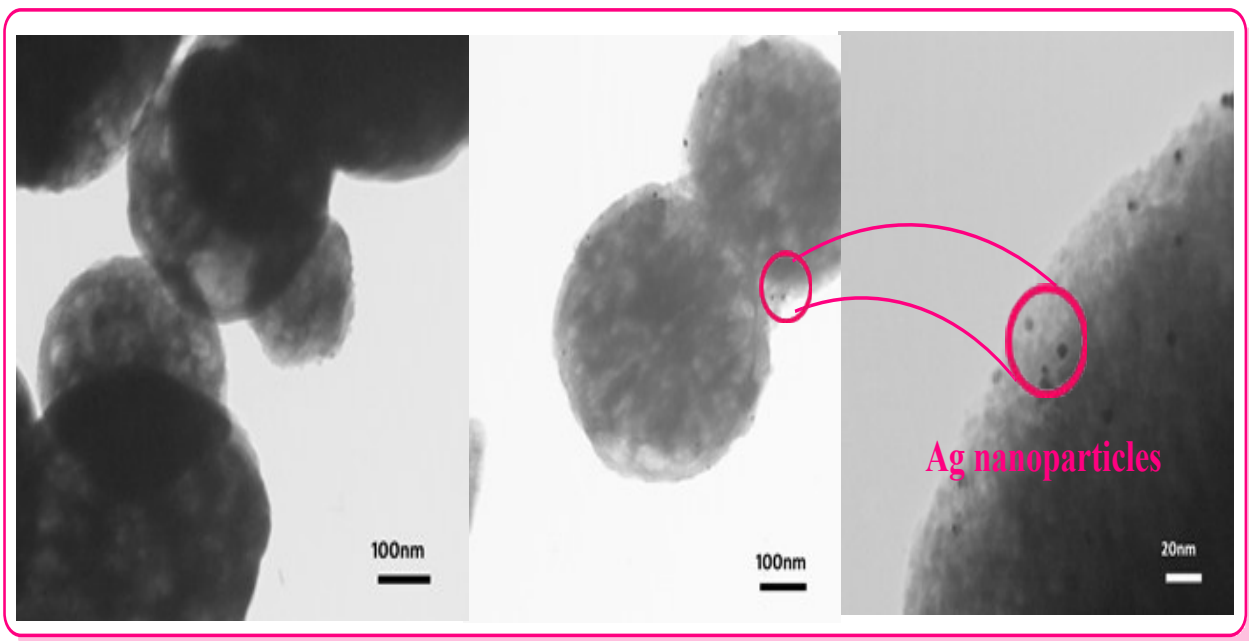

**Figure 6.** The TEM image of h-Fe<sub>2</sub>O<sub>3</sub>@DA/Ag.

### 3. Spectral data for selected compounds

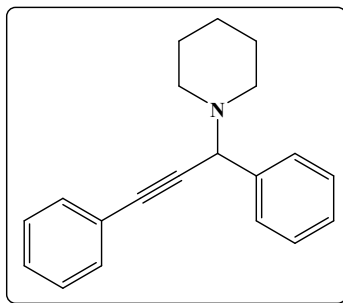

**1-(1,3-diphenylprop-2-ynyl)piperidine (table 1, 5a):** Pale yellow oily liquid;  $^1\text{H}$  NMR (400 MHz,  $\text{CDCl}_3$ , ppm)  $\delta$  1.45-1.49 (m, 2H), 1.58-1.65 (m, 4H), 2.59 (t, 4H), 4.81 (s, 1H), 7.31-7.40 (m, 6H), 7.53-7.55 (m, 2H), 7.65-67 (d,  $J=7.6$  Hz, 2H).

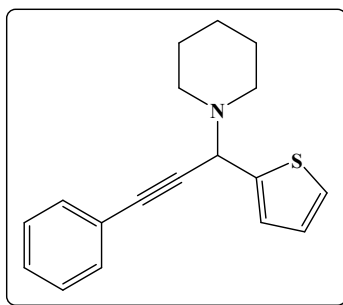

**1-(3-phenyl-1-(thiophen-2-yl)prop-2-ynyl)piperidine (table 1, 5g):** Yellow solid; mp 50-51  $^{\circ}\text{C}$  (Lit.<sup>1</sup> 52-53  $^{\circ}\text{C}$ );  $^1\text{H}$  NMR (400 MHz,  $\text{CDCl}_3$ , ppm)  $\delta$  1.48-1.52 (m, 2H), 1.63-1.70 (m, 4H), 2.62-2.71 (m, 4H), 5.03 (s, 1H), 7.00 (dd,  $J^1=J^2=3.6$  Hz, 1H), 7.25-7.30 (m, 1H), 7.31 (d,  $J=4.4$  Hz, 2H), 7.36-7.38 (m, 3H), 7.54-7.57 (m, 2H);  $^{13}\text{C}$  NMR (100 MHz,  $\text{CDCl}_3$ , ppm)  $\delta$  24.4, 26.1, 50.6, 58.2, 85.3, 86.9, 123, 125.3, 125.8, 126.2, 128.2, 128.3, 131.8, 144.



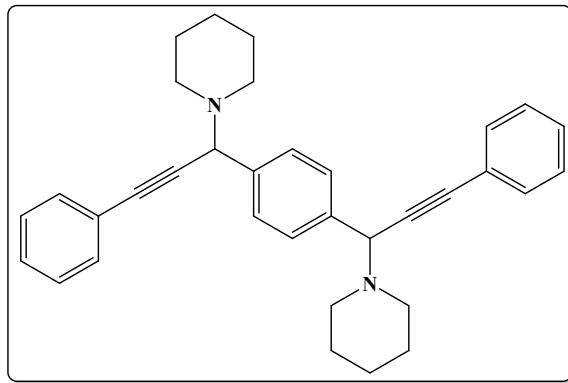

**1-(3-phenyl-1-(4-(3-phenyl-1-(piperidin-1-yl)prop-2-ynyl)phenyl)prop-2-ynyl)piperidine (table 1, 5h):** White solid; mp 157-159 °C (Lit.<sup>1</sup> 158-160 °C); <sup>1</sup>H NMR (400 MHz, CDCl<sub>3</sub>, ppm) δ 1.47 (m, 2H), 1.59-1.63 (m, 4H), 2.59 (m, 4H), 4.81 (s, 1H), 7.33-7.35 (m, 3H), 7.52-7.55 (m, 2H), 7.63 (s, 2H).

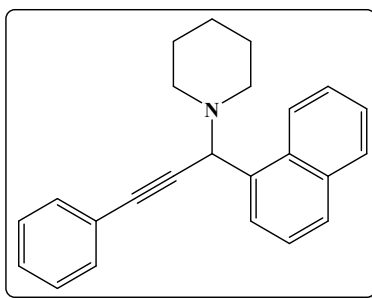

**1-(1-(naphthalen-3-yl)-3-phenylprop-2-ynyl)piperidine (table 1, 5i):** Yellow oil; <sup>1</sup>H NMR (400 MHz, CDCl<sub>3</sub>, ppm): δ 1.47-1.51 (m, 2H), 1.60-1.67 (m, 4H), 2.64 (t, 4H), 4.97 (s, 1H), 7.36-7.40 (m, 3H), 7.48-7.52 (m, 2H), 7.58-7.61 (m, 2H), 7.79 (dd, J<sup>1</sup>=J<sup>2</sup>=8.4 Hz, 1H), 7.85-7.91 (m, 3H), 8.11 (s, 1H); <sup>13</sup>C NMR (100 MHz, CDCl<sub>3</sub>, ppm) δ 24.4, 26.2, 50.8, 62.5, 86, 88.1, 123.3, 125.8, 125.9, 126.7, 127.2, 127.5, 127.7, 128.1, 128.12, 131.8, 132.9, 133.1, 136.3.

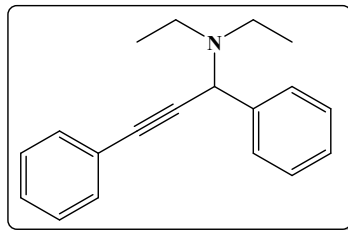

**N,N-diethyl-1,3-diphenylprop-2-yn-1-amine (table 1, 5r):** Pale yellow oily liquid;  $^1\text{H}$  NMR (400 MHz,  $\text{CDCl}_3$ , ppm)  $\delta$  1.04 (m, 6H), 2.36-2.62 (m, 4H), 5.19 (s, 1H), 7.15-7.27 (m, 4H), 7.29-7.38 (m, 3H), 7.39-7.41 (m, 2H).

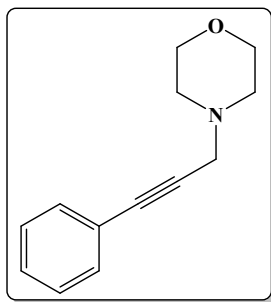

**4-(3-phenylprop-2-ynyl)morpholine (table 1, 6c):** yellow oil;  $^1\text{H}$  NMR (400 MHz,  $\text{CDCl}_3$ , ppm)  $\delta$  2.64-2.67 (m, 6H), 3.52 (s, 3H), 3.69-3.71 (m, 1H), 3.77-3.79 (m, 6H), 7.28-7.31 (m, 4H), 7.43-7.46 (m, 2H).

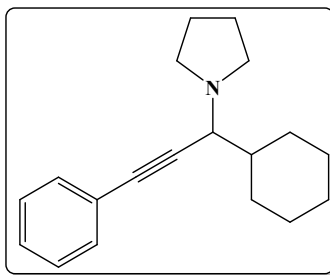

**1-(1-cyclohexyl-3-phenylprop-2-ynyl)pyrrolidine (table 1, 6i):** Colorless liquid;  $^1\text{H}$  NMR (400 MHz,  $\text{CDCl}_3$ , ppm)  $\delta$  1.05-1.36 (m, 5H), 1.56-1.63 (m, 2H), 1.75-1.79 (m, 6H), 1.82-2.10 (m, 4H), 2.5-2.98 (m, 4H), 3.36-3.38 (d,  $J = 7.6$  Hz, 1H), 7.14-7.33 (m,

3H), 7.50-7.63 (m, 2H).  $^{13}\text{C}$  NMR (100 MHz,  $\text{CDCl}_3$ , ppm)  $\delta$  24.9, 26.9, 27.1, 28.3, 32.7, 33, 42.9, 51.1, 61.1, 86.1, 88.9, 125.9, 128.9, 129.8, 132.6.

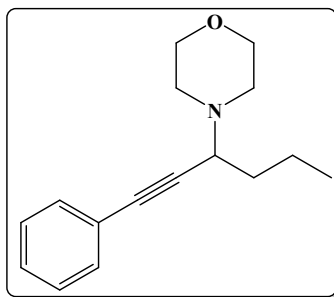

**4-(1-phenylhex-1-yn-3-yl)morpholine (Table 1, 6m):** Yellow oil;  $^1\text{H}$  NMR (400 MHz,  $\text{DMSO}-d_6$ , ppm)  $\delta$  0.97 (m, 3H), 1.45-1.75 (m, 4H), 2.67-2.70 (m, 2H), 2.79-2.83 (m, 2H), 3.82-4.13 (m, 1H), 4.15-4.17 (m, 4H), 7.46-7.50 (m, 3H), 7.62-7.64 (m, 2H).

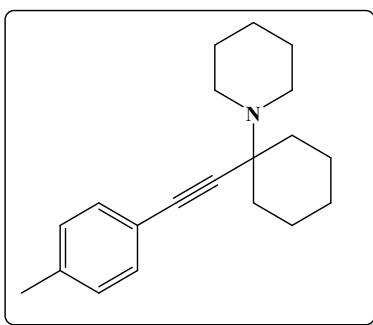

**1-(1-(2-p-tolyethynyl)cyclohexyl)piperidine (Table 2, 8e):** Yellow oil;  $^1\text{H}$  NMR (400 MHz,  $\text{CDCl}_3$ , ppm)  $\delta$  1.39-1.93 (m, 16H), 2.17-2.20 (m, 2H), 2.53 (s, 3H), 2.73-2.83 (m, 2H), 7.26-7.27 (m, 3H), 7.46-7.48 (m, 2H);  $^{13}\text{C}$  NMR (100 MHz,  $\text{CDCl}_3$ , ppm)  $\delta$  21.32, 23.4, 24.4, 25, 26.7, 37.6, 47.9, 58.8, 85.4, 92.1, 123, 127.6, 128.3, 133.

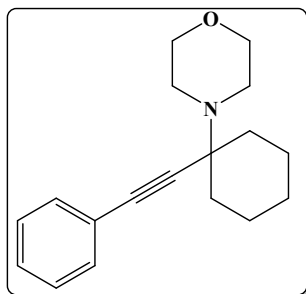

**4-(1-(2-phenylethynyl)cyclohexyl)morpholine (Table 2, 8f):** Pale yellow oily liquid;  $^1\text{H}$  NMR (400 MHz,  $\text{CDCl}_3$ , ppm)  $\delta$  1.28-1.30 (m, 1H), 1.52 (m, 2H), 1.63-1.67 (m, 3H), 1.73 (br.s, 2H), 2.03-2.05 (m, 2H), 2.74 (br.s, 4H), 3.78 (br.s, 4H), 7.27 (m, 3H), 7.44-7.45 (m, 2H),  $^{13}\text{C}$  NMR (100 MHz,  $\text{CDCl}_3$ , ppm)  $\delta$  22.7, 25.7, 35.4, 46.6, 58.8, 67.4, 86.4, 89.8, 123.4, 127.7, 128.1, 131.7.

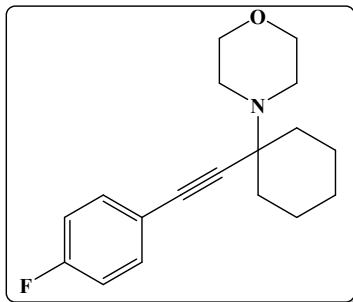

**4-(1-(4-fluorophenyl)ethynyl)cyclohexyl)morpholine (Table 2, 8i):** Yellow oil;  $^1\text{H}$  NMR (400 MHz,  $\text{DMSO}-d_6$ , ppm)  $\delta$  1.26-1.34 (m, 1H), 1.57-1.62 (m, 2H), 1.69-1.78 (m, 3H), 1.80-1.86 (m, 2H), 2.00-2.02 (m, 2H), 2.78 (s, 4H), 3.70 (br.t,  $J = 4.2$  Hz, 4H), 6.97-7.00 (t,  $J = 8.6$  Hz, 2H), 7.32-7.40 (m, 2H).

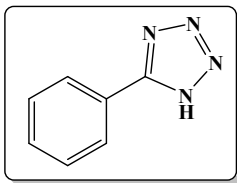

**5-Phenyl-1H-tetrazole (Table 3, 9a):** White solid; mp 213–215 °C (Lit.<sup>2</sup> 214–215 °C);  $^1\text{H}$  NMR (400 MHz,  $\text{DMSO}-d_6$ , ppm)  $\delta$  7.68 (s, 3H, Ph), 7.92 (s, 2H, Ph);  $^{13}\text{C}$  NMR (100 MHz,  $\text{DMSO}-d_6$ , ppm)  $\delta$  126.6, 128.6, 130.3, 134.6, 155.

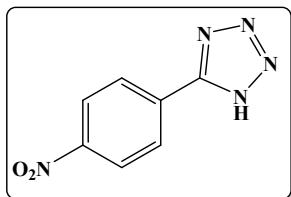

**5-(4-Nitrophenyl)-1H-tetrazole (Table 3, 9b):** Yellow solid; mp 218–219 °C (Lit.<sup>2</sup> 220-222 °C); <sup>1</sup>H NMR (400 MHz, DMSO-*d*<sub>6</sub>, ppm) δ 8.30 (d, 2H, *J* 8.4, Ph), 8.39 (d, 2H, *J* 8.8, Ar-H); <sup>13</sup>C NMR (100 MHz, DMSO-*d*<sub>6</sub>, ppm) δ 127.6, 129.1, 131, 149.5.

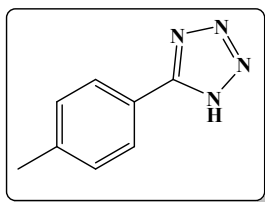

**5-(4-Methylphenyl)-1H-tetrazole (Table 3, 9c):** White solid; mp 249-251 °C (Lit.<sup>2</sup> 247-249 °C); <sup>1</sup>H NMR (250 MHz, DMSO-*d*<sub>6</sub>, ppm) δ 2.35 (s, 3H, CH<sub>3</sub>), 7.37 (d, 2H, *J* 7.6 Hz, Ph), 7.90 (d, 2H, *J* 7.5 Hz, Ph).

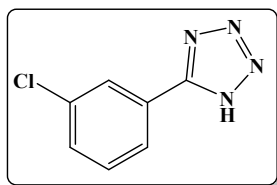

**5-(3-Chlorophenyl)-1H-tetrazole (Table 3, 9g):** White solid; mp 138-140 °C (Lit.<sup>3</sup>137-139 °C); <sup>1</sup>H NMR (250 MHz, DMSO-*d*<sub>6</sub>, ppm) δ 7.55 (m, 2H, Ph), 7.96 (d, 1H, *J* 7.6, Ph), 7.99, (s, 1H); <sup>13</sup>C NMR (62.9 MHz, DMSO-*d*<sub>6</sub>, ppm) δ 125.4, 126.2, 126.4, 130.7, 131.1, 133.9, 154.6.

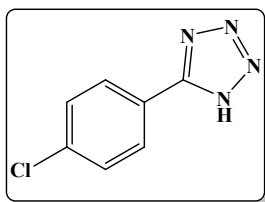

**5-(4-Chlorophenyl)-1H-tetrazole (Table 3, 9h):** White solid; mp 251-253 °C (Lit.<sup>2</sup> 251-252 °C); <sup>1</sup>H NMR (400 MHz, DMSO-*d*<sub>6</sub>, ppm) δ 7.61 (d, 2H, *J* 8.4, Ph), 8.09 (d, 2H, *J* 8.8, Ph).

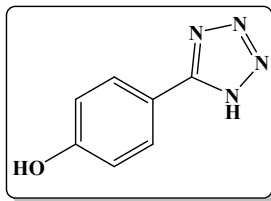

**5-(4-Hydroxyphenyl)-1H-tetrazole (Table 3, 9j):** White solid; mp 235 °C (Lit.<sup>2</sup> 233-234 °C); <sup>1</sup>H NMR (400 MHz, DMSO-*d*<sub>6</sub>, ppm) δ 6.91 (d, 2H, *J* 8.4, Ph), 7.58 (d, 2H, *J* 8.4, Ph), 10.11 (s broad, OH); <sup>13</sup>C NMR (100 MHz, DMSO-*d*<sub>6</sub>, ppm) δ 116.1, 117.4, 128.8, 153.2, 159.8.

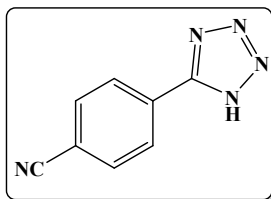

**4-(1H-tetrazol-5-yl)benzotrile (Table 3, 9k):** White solid; mp 257-259 °C (Lit.<sup>4</sup> 258-260 °C); <sup>1</sup>H NMR (250 MHz, DMSO-*d*<sub>6</sub>, ppm) δ 8.06 (d, 2H, *J* 7.1, Ph), 8.19 (d, 2H, *J* 8.6, Ar-H); <sup>13</sup>C NMR (62.9 MHz, DMSO-*d*<sub>6</sub>, ppm) δ 113.3, 118.1, 127.6, 128.7, 133.1, 155.2, 162.2.

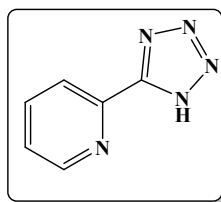

**2-(1H-tetrazol-5-yl)pyridine (Table 3, 9l):** White solid; mp 210-213 °C (Lit.<sup>5</sup> 211-212 °C); <sup>1</sup>H NMR (400 MHz, DMSO-*d*<sub>6</sub>, ppm) δ 7.75 (s, 1H, Ph), 8.07 (s, 1H, Ph), 8.20 (d, 1H, *J* 8.4 Ph), 8.63 (s, 1H).

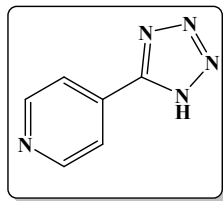

**4-(1H-tetrazol-5-yl)pyridine (Table 3, 9m):** White solid; mp 256-258 °C (Lit.<sup>6</sup> 256-258 °C); <sup>1</sup>H NMR (250 MHz, DMSO-*d*<sub>6</sub>, ppm) δ 8.10 (d, 2H, *J* 6.0, Ph), 8.77 (d, 2H, *J* 6.5, Ph); <sup>13</sup>C NMR (62.9 MHz, DMSO-*d*<sub>6</sub>, ppm) δ 120.9, 121.3, 133.8, 149.9, 165.7.

### 3.1. Copies of $^1\text{H}$ and $^{13}\text{C}$ NMR for selected products

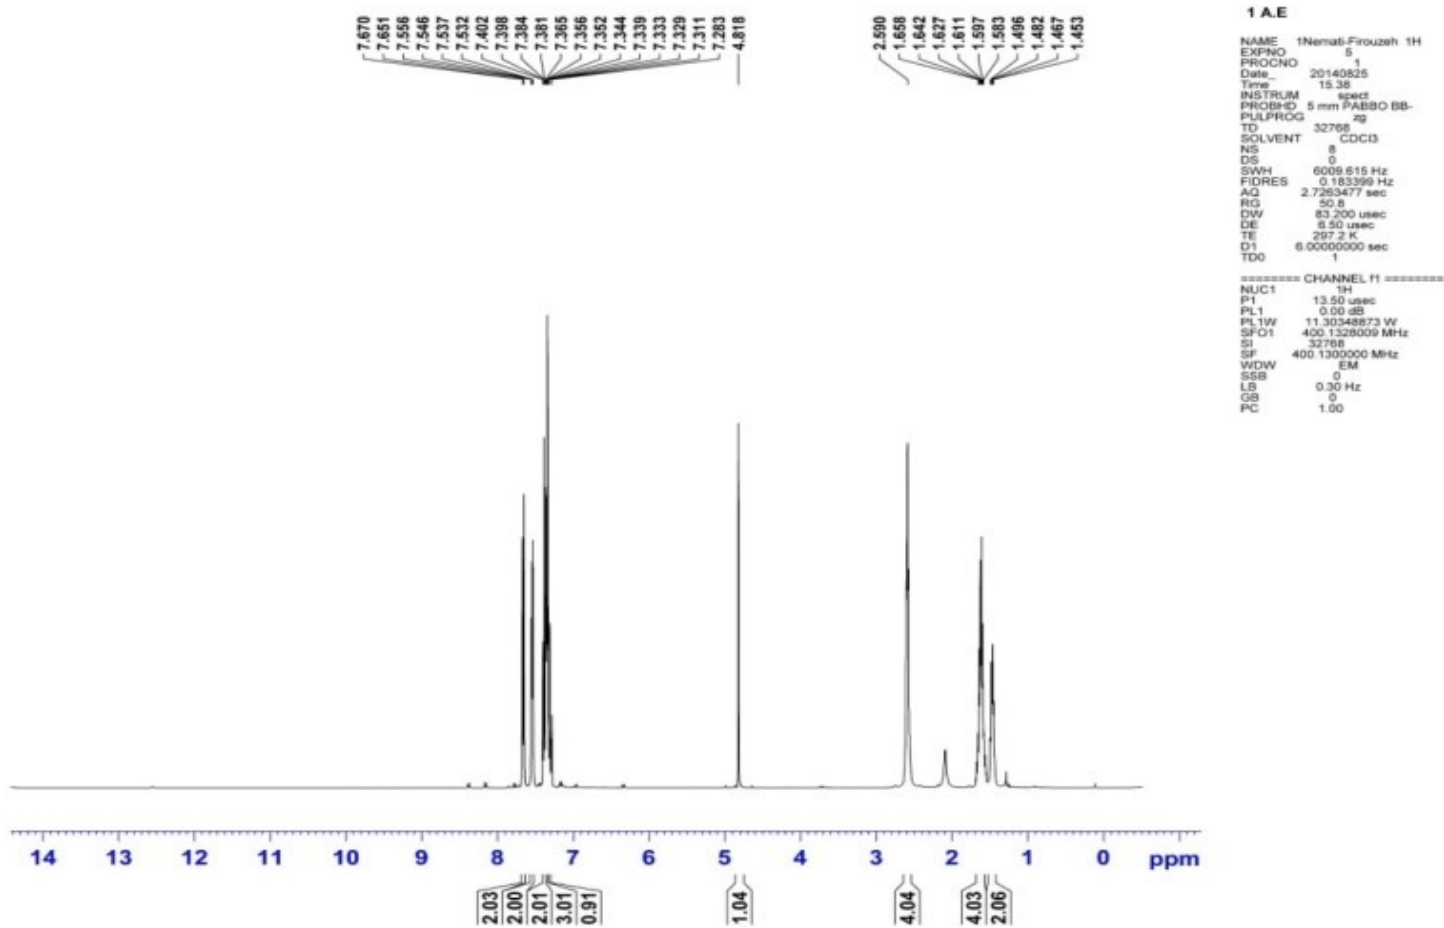

Figure 7.  $^1\text{H}$  NMR spectrum of (table 1, 5a)



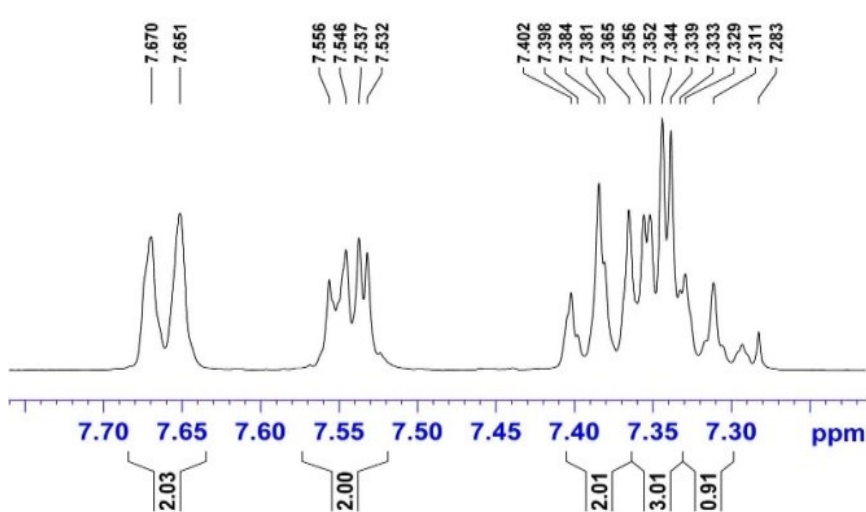

1 A.E

NAME 1Nemati-Firouzeh 1H  
 EXPNO 5  
 PROCNO 1  
 Date\_ 20140825  
 Time 15.38  
 INSTRUM spect  
 PROBHD 5 mm PABBO BB-  
 PULPROG zg  
 TD 32768  
 SOLVENT CDCl3  
 NS 8  
 DS 0  
 SWH 6009.615 Hz  
 FIDRES 0.183399 Hz  
 AQ 2.7263477 sec  
 RG 50.8  
 DW 83.200 usec  
 DE 6.50 usec  
 TE 297.2 K  
 D1 6.0000000 sec  
 TDO 1

===== CHANNEL f1 =====  
 NUC1 1H  
 P1 13.50 usec  
 PL1 0.00 dB  
 PL1W 11.30348873 W  
 SFO1 400.1326009 MHz  
 SI 32768  
 SF 400.1300000 MHz  
 WDW EM  
 SSB 0  
 LB 0.30 Hz  
 GB 0  
 PC 1.00

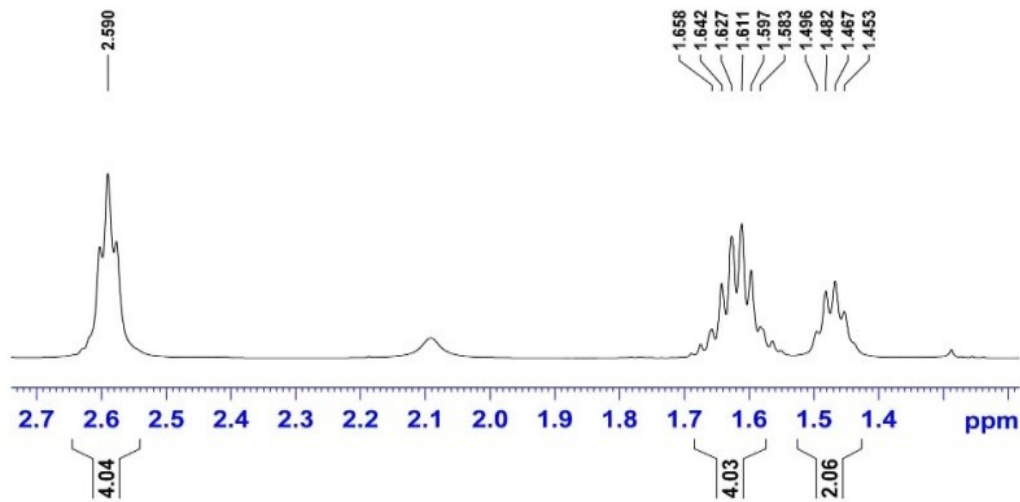

Figure 8. <sup>1</sup>H NMR, Expand spectrum of (table 1, 5a)

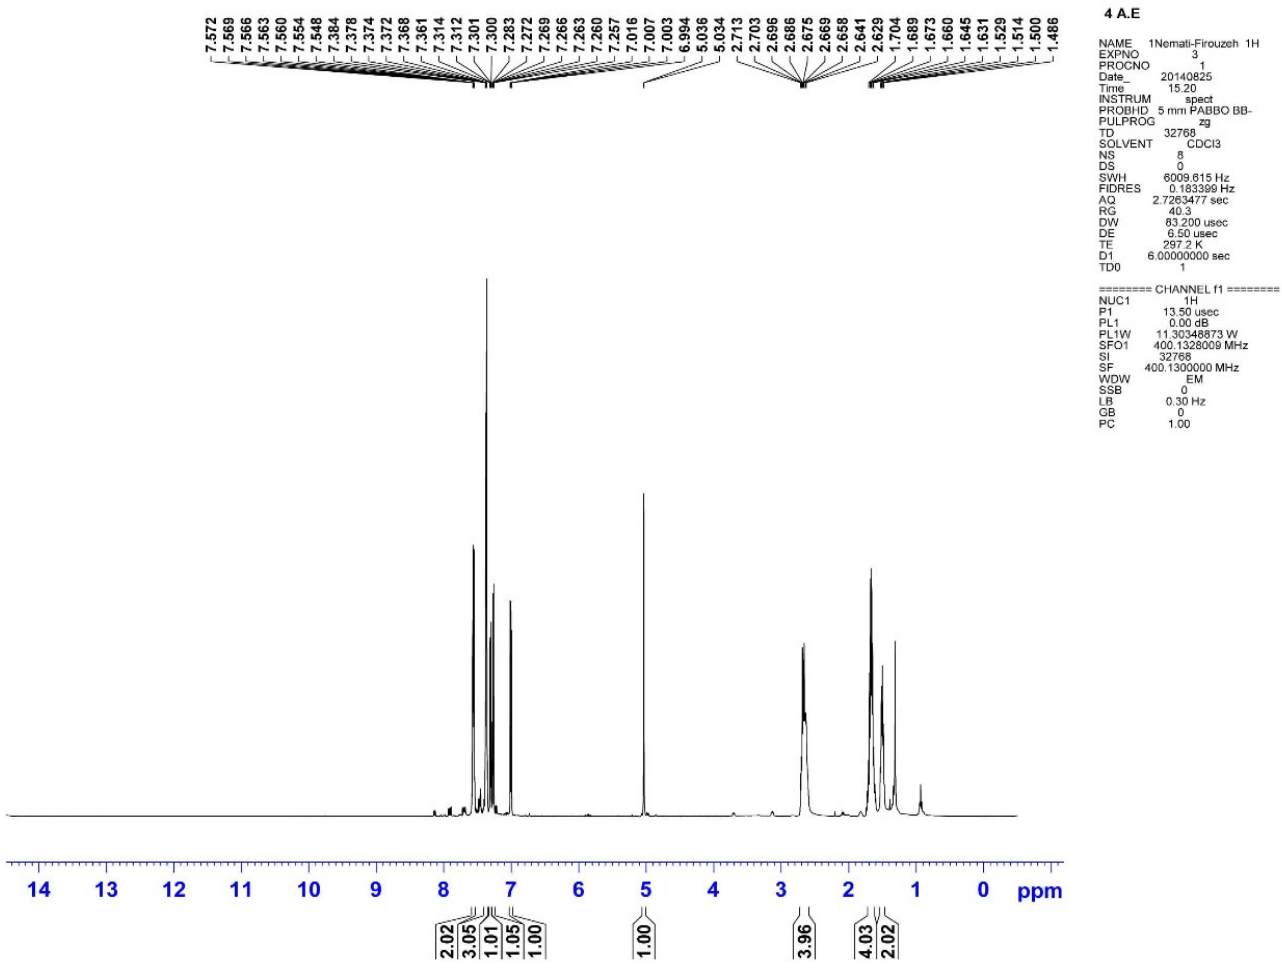

Figure 9. <sup>1</sup>H NMR, spectrum of (table 1, 5g)

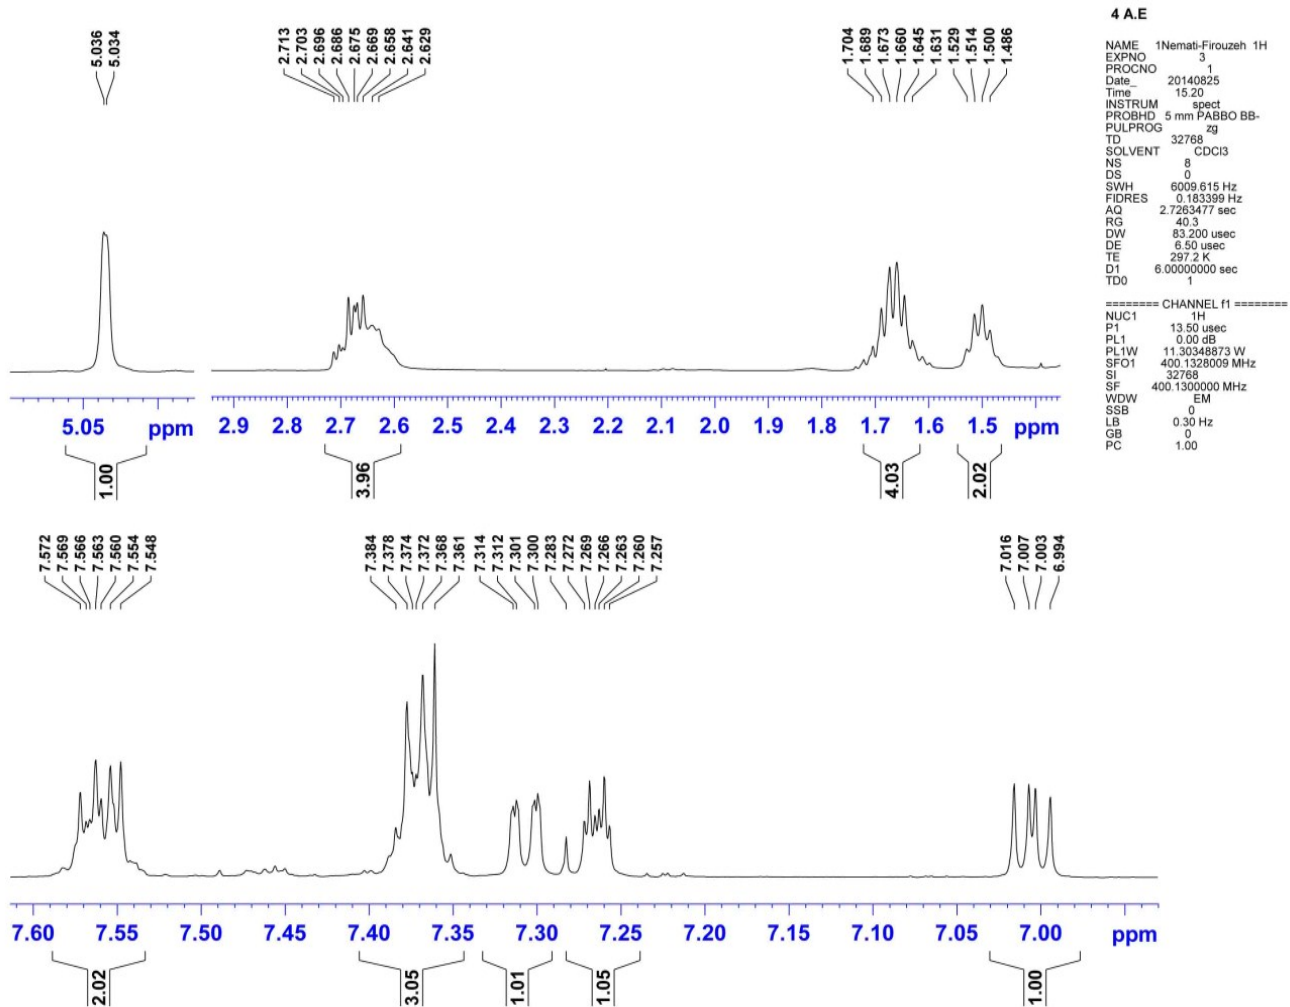

**Figure 10**  $^1\text{H}$  NMR, Expand spectrum of (table 1, 5g)

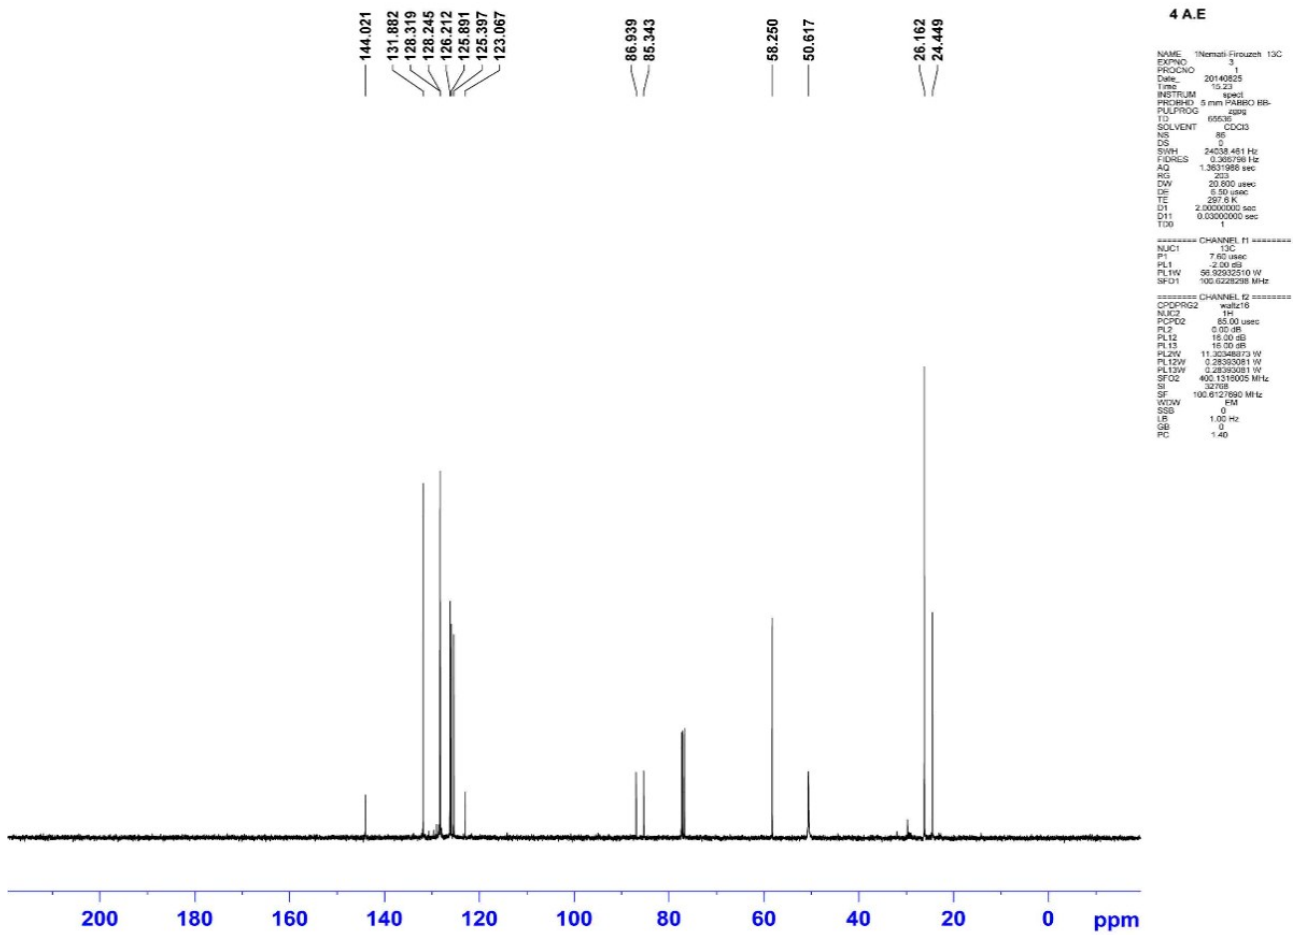

Figure 11 <sup>13</sup>C NMR, Expand spectrum of (table 1, 5g)

## 4 A.E

```
NAME 1Nemati-Firouzeh 13C
EXPNO 3
PROCNO 1
Date_ 20140825
Time 15.23
INSTRUM spect
PROBHD 5 mm PABBO BB-
PULPROG zgpg
TD 65536
SOLVENT CDCl3
NS 86
DS 0
SWH 24038.461 Hz
FIDRES 0.366798 Hz
AQ 1.3631988 sec
RG 203
DW 20.800 usec
DE 6.50 usec
TE 297.0 K
D1 2.0000000 sec
D11 0.0300000 sec
TD0 1
```

```
===== CHANNEL f1 =====
NUC1 13C
P1 7.50 usec
PL1 -2.00 dB
PL1W 56.92932510 W
SFO1 100.6226266 MHz
```

```
===== CHANNEL f2 =====
CPDPRG2 waltz16
NUC2 1H
PCPD2 85.00 usec
PL2 0.00 dB
PL12 16.00 dB
PL13 16.00 dB
PL2W 11.30348873 W
PL12W 0.28363081 W
PL13W 0.28363081 W
SFO2 400.1316005 MHz
SI 32768
SF 100.6127690 MHz
WDW EM
SSB 0
LB 1.00 Hz
GB 0
PC 1.40
```

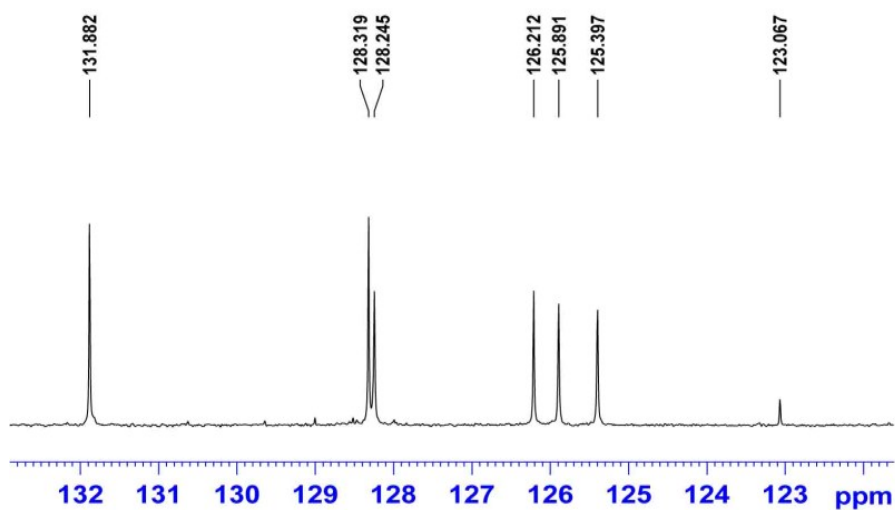

Figure 12  $^{13}\text{C}$  NMR, Expand spectrum of (table 1, 5g)

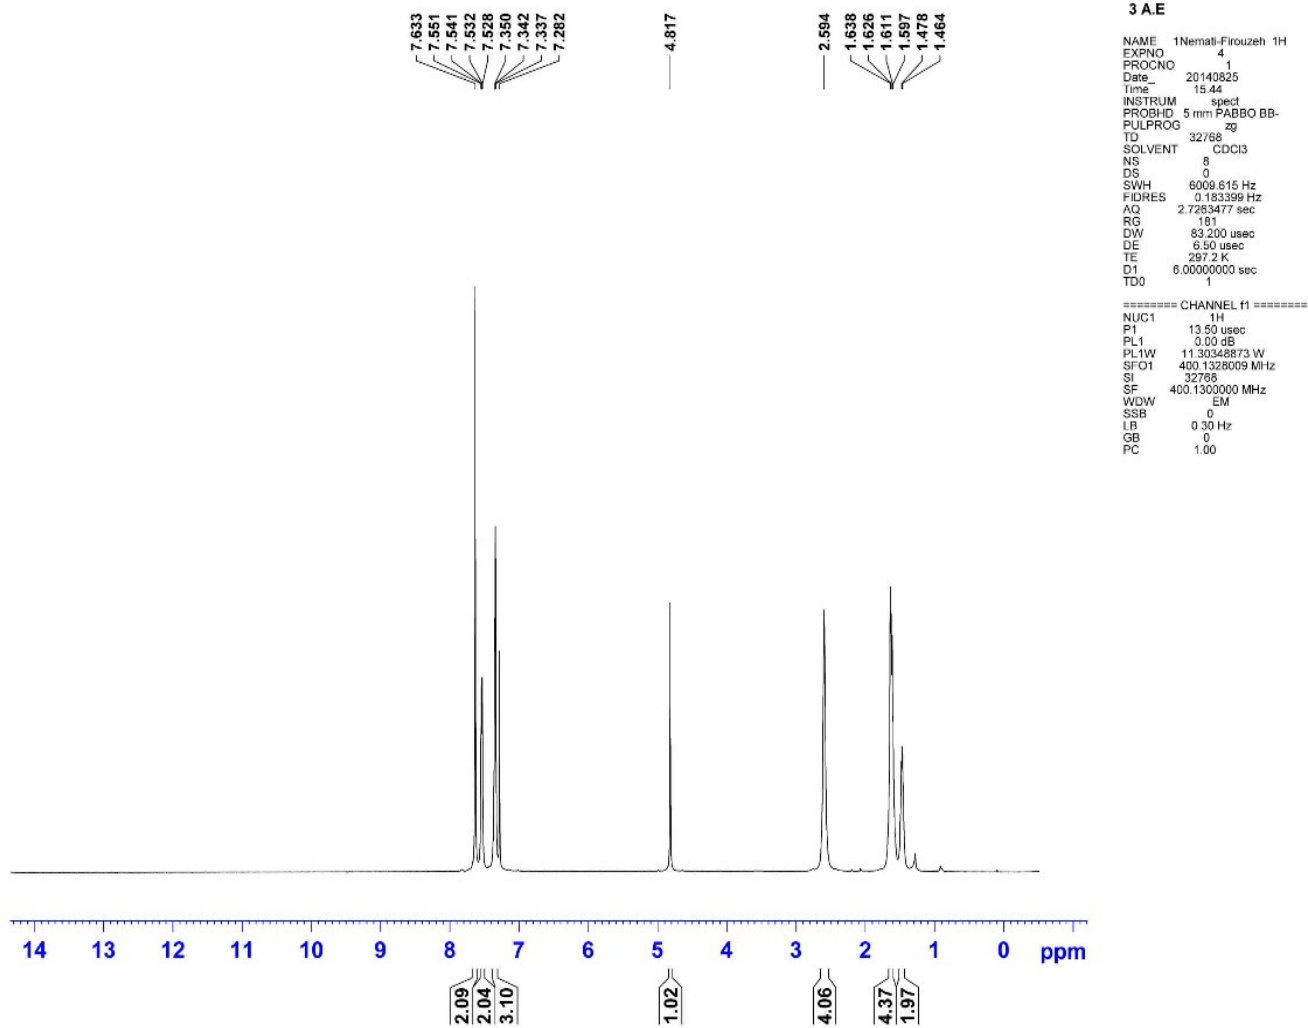

Figure 13  $^1\text{H}$  NMR, spectrum of (table 1, 5h)

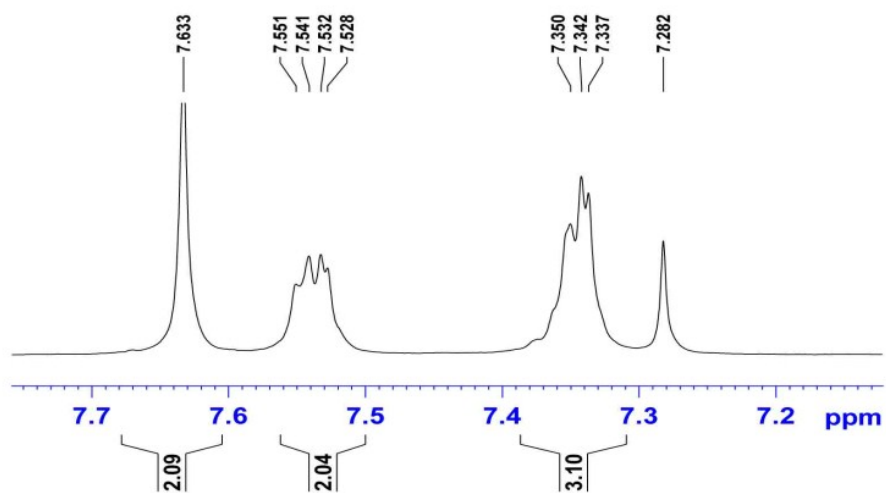

### 3 A.E

```

NAME 1Nemati-Firouzeh 1H
EXPNO 4
PROCNO 1
Date_ 20140825
Time 15.44
INSTRUM spect
PROBHD 5 mm PABBO BB-
PULPROG zg
TD 32768
SOLVENT CDCl3
NS 8
DS 0
SWH 6009.615 Hz
FIDRES 0.183399 Hz
AQ 2.7263477 sec
RG 181
DW 83.200 usec
DE 6.50 usec
TE 297.2 K
D1 6.0000000 sec
TD0 1

```

```

===== CHANNEL f1 =====
NUC1 1H
P1 13.50 usec
PL1 0.00 dB
PL1W 11.30348873 W
SFO1 400.1328009 MHz
SI 32768
SF 400.1300000 MHz
WDW EM
SSB 0
LB 0.30 Hz
GB 0
PC 1.00

```

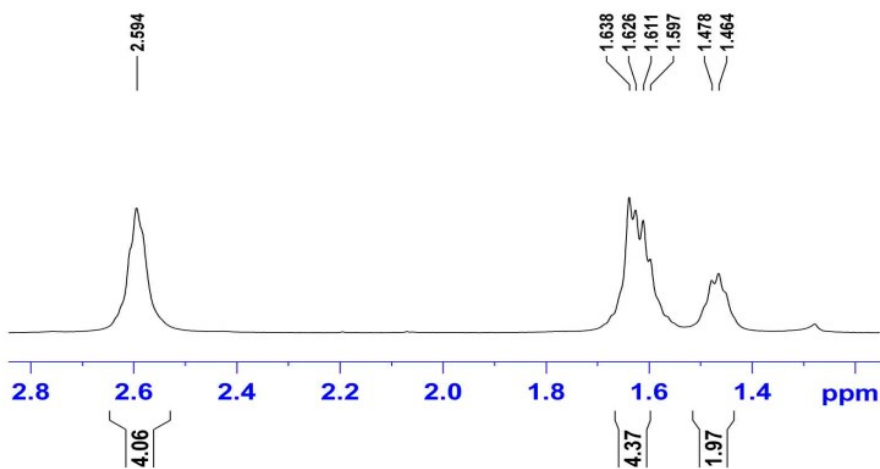

Figure 14 <sup>1</sup>H NMR, Expand spectrum of (table 1, 5h)

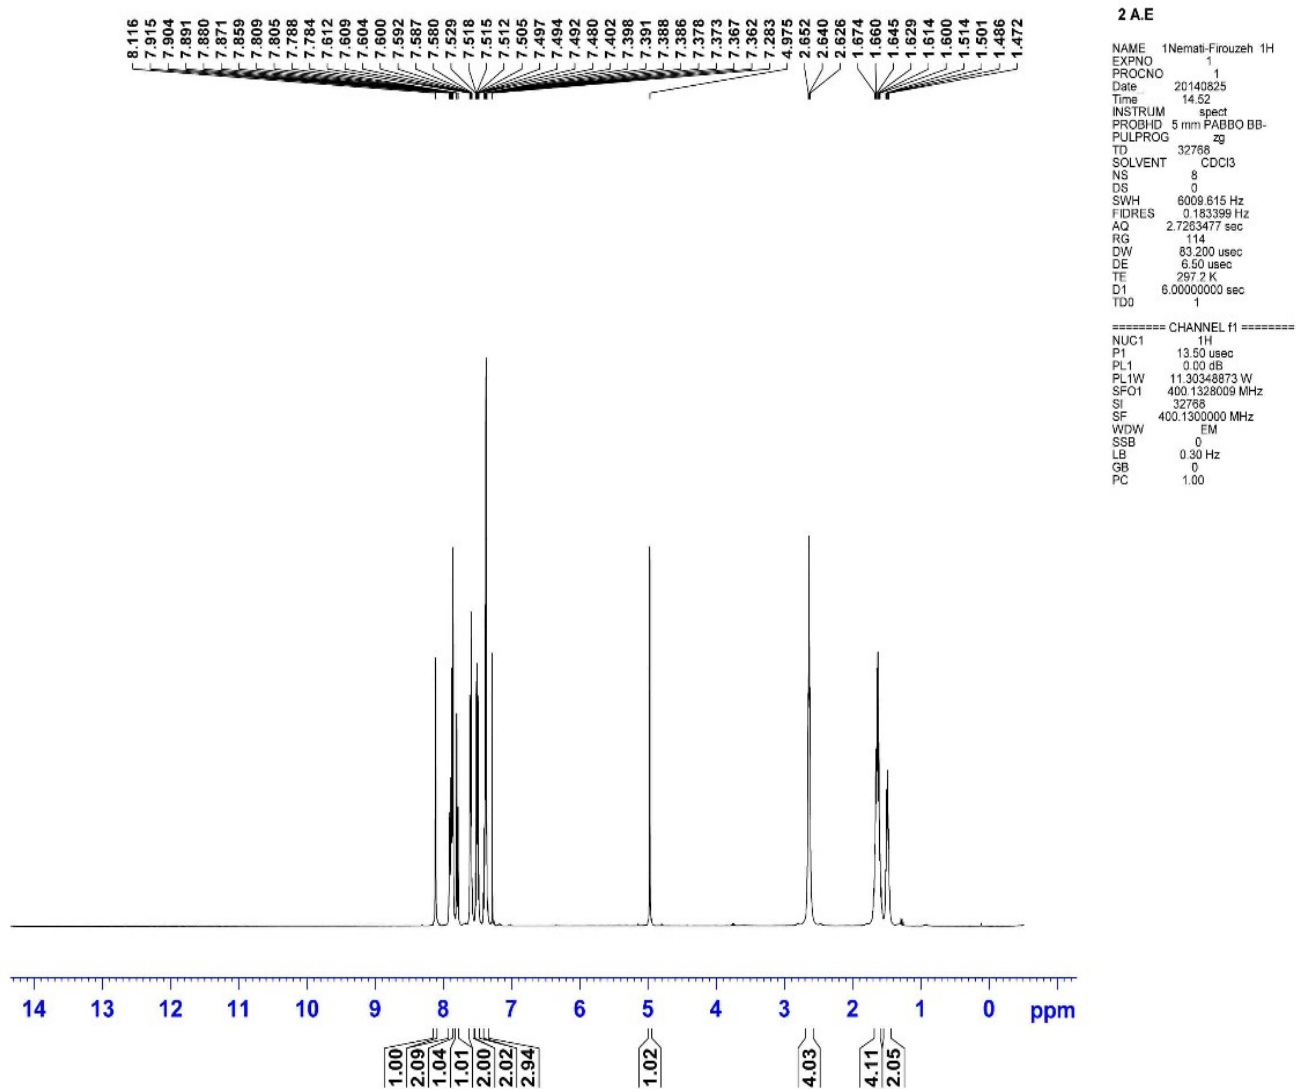

Figure 15  $^1\text{H}$  NMR, spectrum of (table 1, 5i)



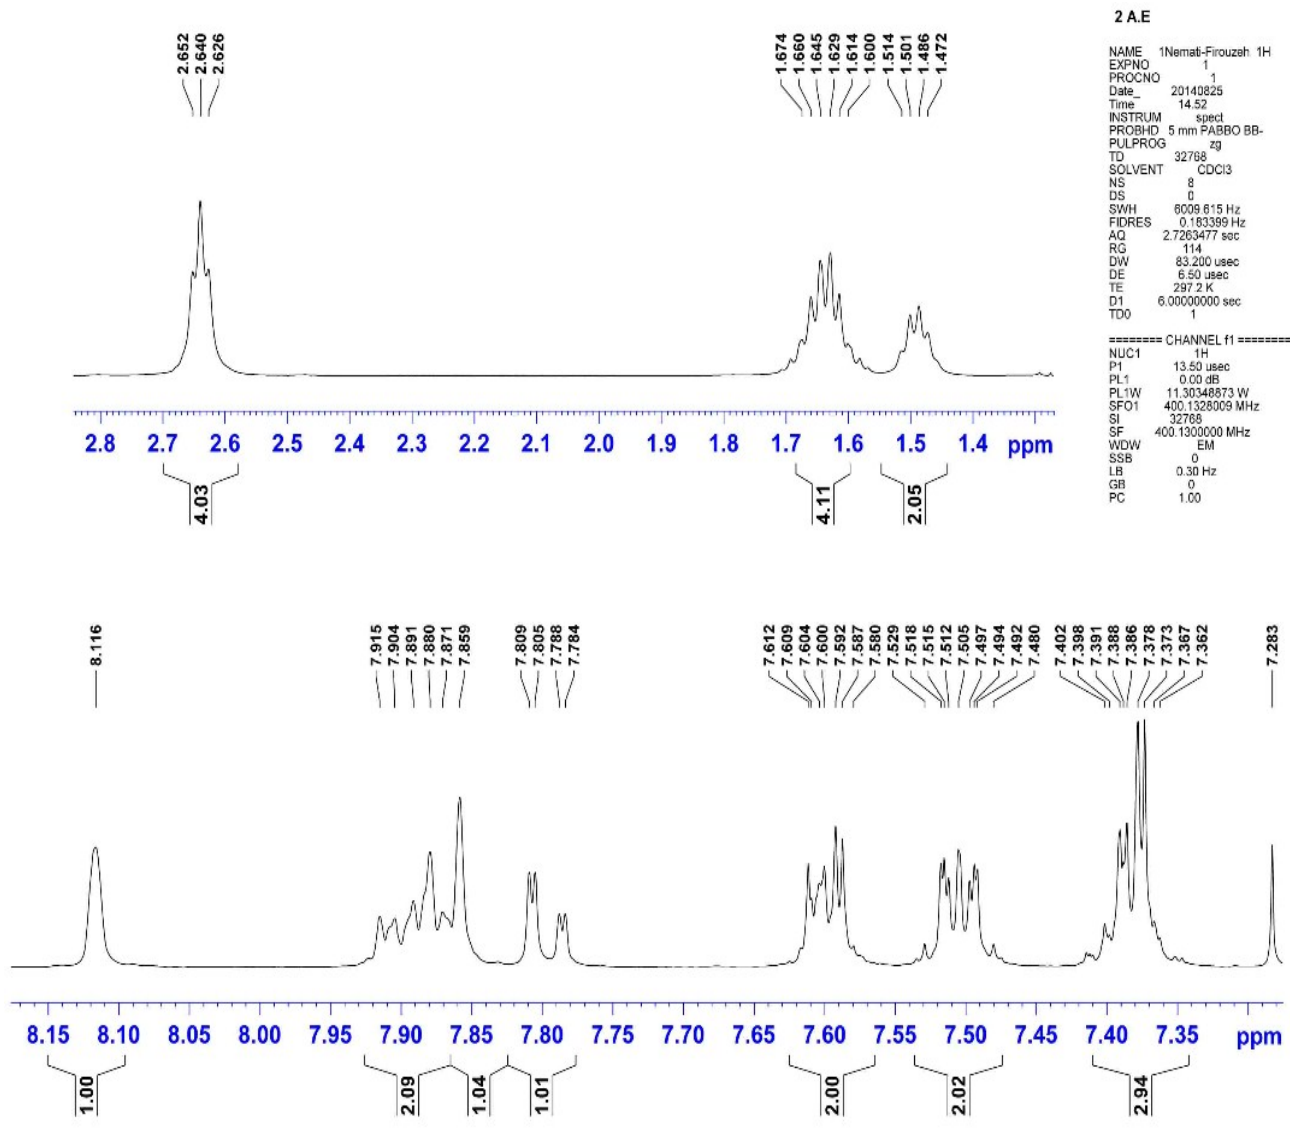

Figure 16 <sup>1</sup>H NMR, Expand spectrum of (table 1, 5i)

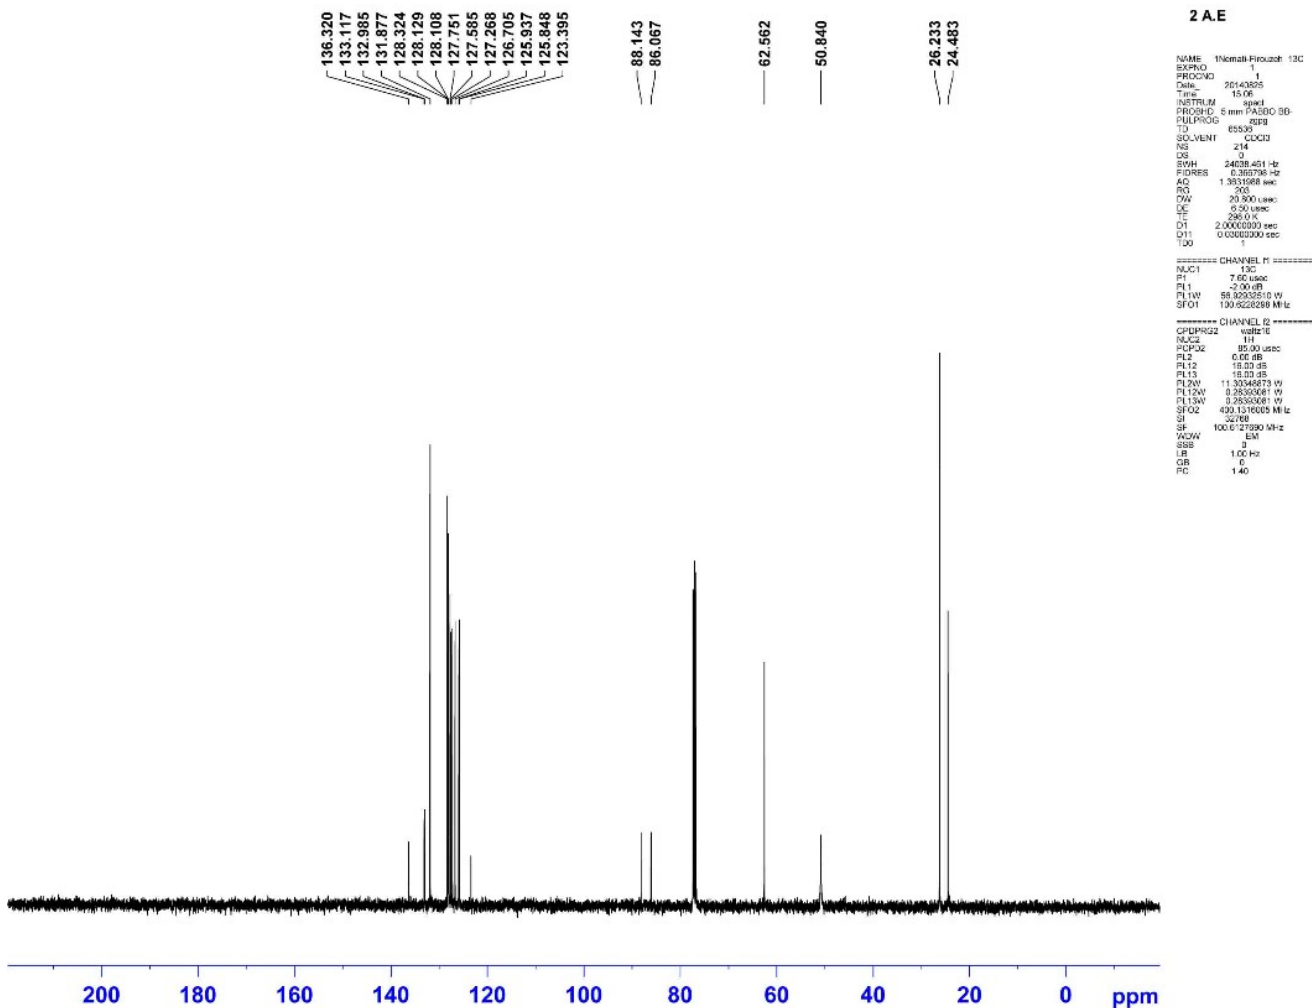

Figure 17 <sup>13</sup>C NMR, spectrum of (table 1, 5i)

2A.E

NAME Inmetri Frazzoh 13C  
EXPRO 1  
PROCNO 1  
Date 20160825  
Time 16.06  
INSTRUM spect  
PROBHD 5 mm PABBO BB-  
PULPROG zgpg  
ID 05523  
SOLVENT CDCl3  
NS 214  
DS 0  
SWH 24038.481 Hz  
FIDRES 0.358788 Hz  
AQ 1.3631388 sec  
RG 203  
DW 20.800 usec  
DE 6.00 usec  
TE 298.0 K  
D1 2.0000000 sec  
D11 0.33000000 sec  
TDC

----- CHANNEL f1 -----  
NUC1 13C  
P1 7.00 usec  
PL1 -2.00 dB  
PL1W 80.9282210 W  
SFO1 100.628268 MHz  
----- CHANNEL f2 -----  
CPDPRG2 waltz16  
NUC2 1H  
PCPD2 85.00 usec  
PL2 0.00 dB  
PL12 18.00 dB  
PL13 18.00 dB  
PL2W 11.30048873 W  
PL12W 0.28300081 W  
PL13W 0.28300081 W  
SFO2 400.1316000 MHz  
SF 427.08  
SF2 100.6127860 MHz  
WDW EM  
SSB 0  
LF 1.00 Hz  
GB 0  
PC 1.40

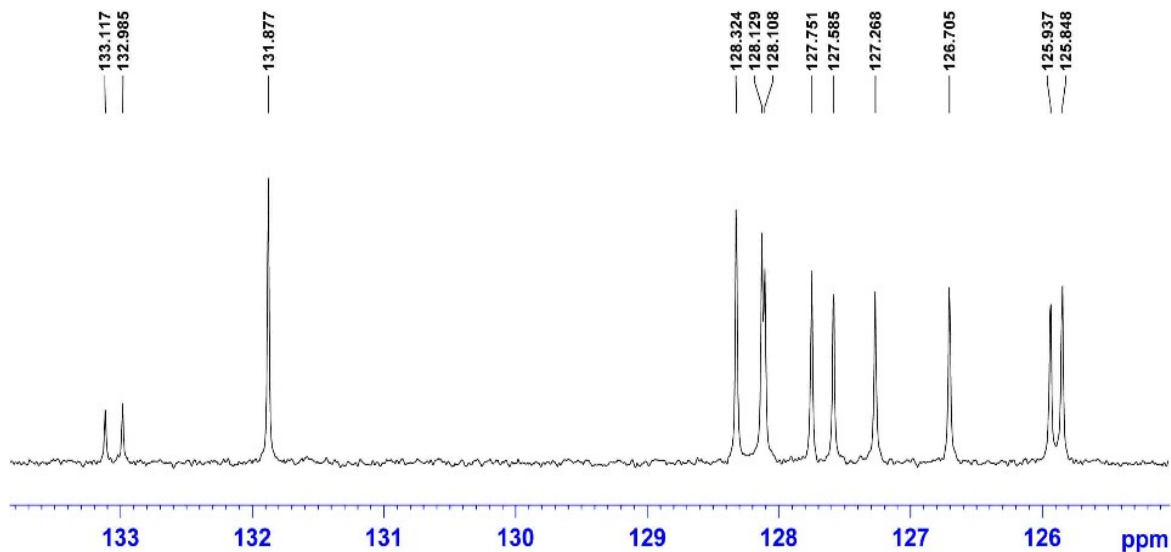

Figure 18 <sup>13</sup>C NMR, Expand spectrum of (table 1, 5i)

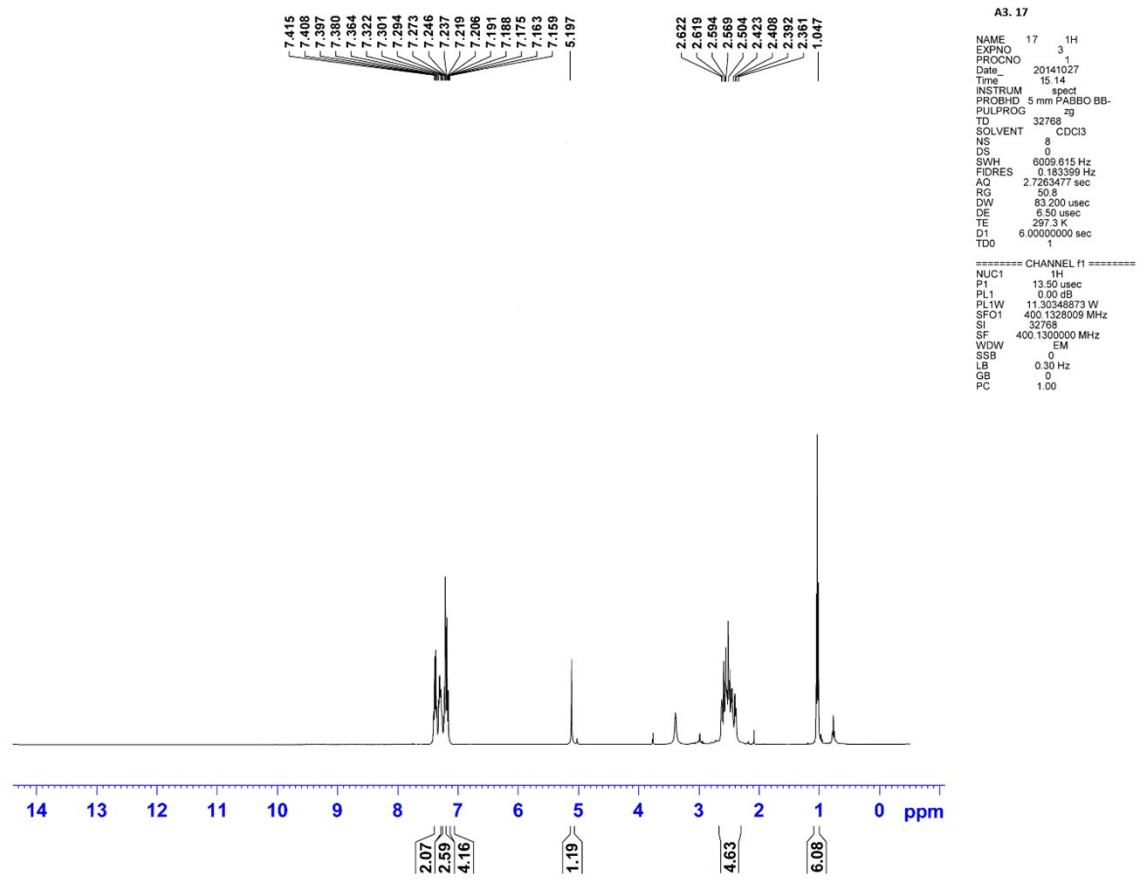

Figure 19  $^1\text{H}$  NMR, spectrum of (table 1, 5r)

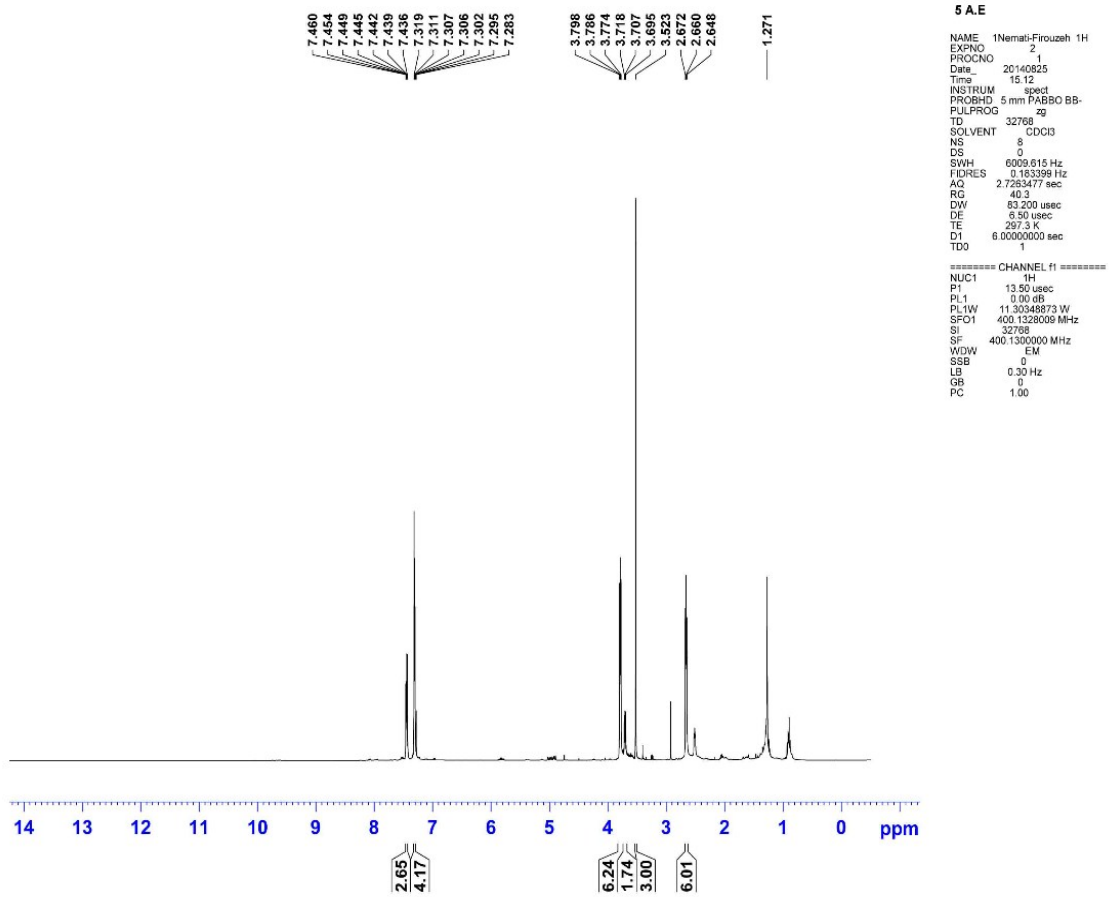

Figure 20  $^1\text{H}$  NMR, spectrum of (table 1, 6c)

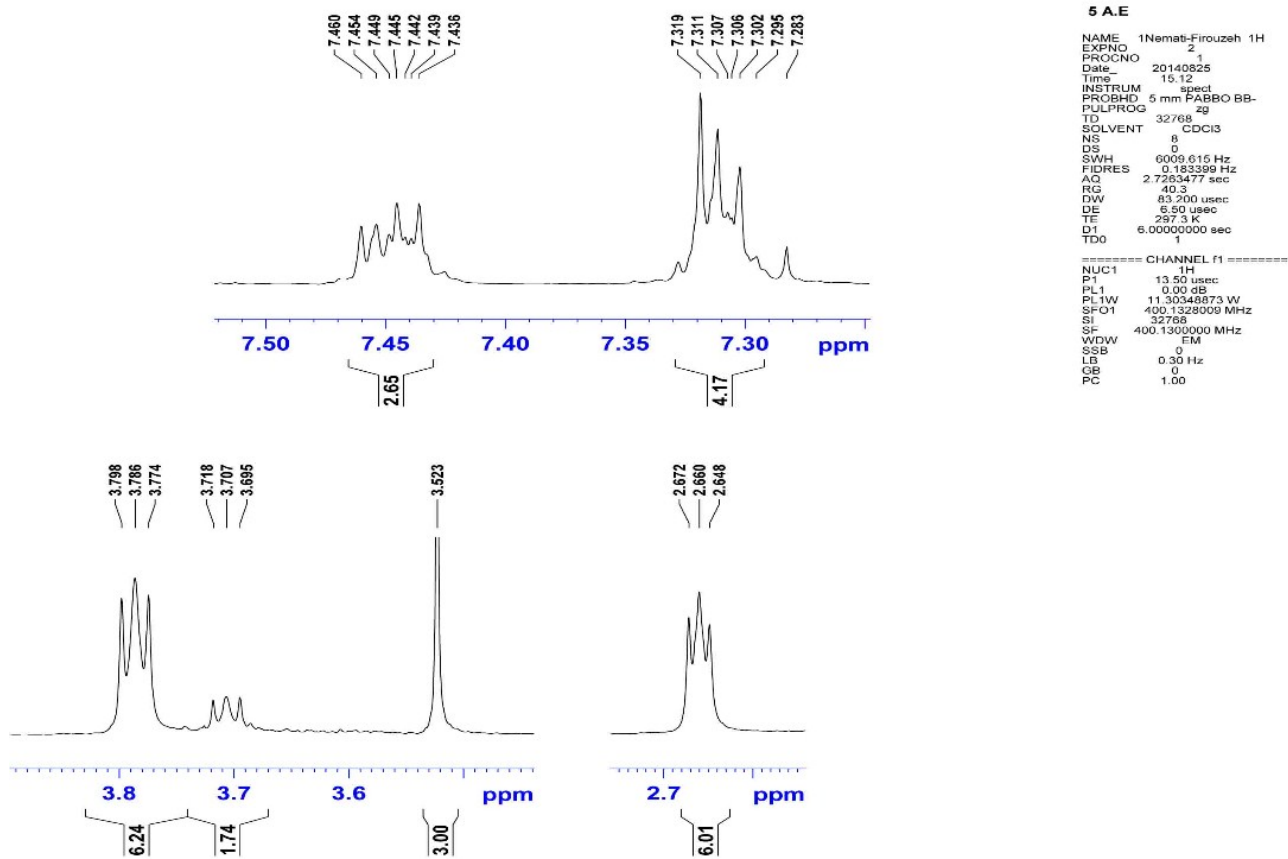

Figure 21  $^1\text{H}$  NMR, Expand spectrum of (table 1, 6c)

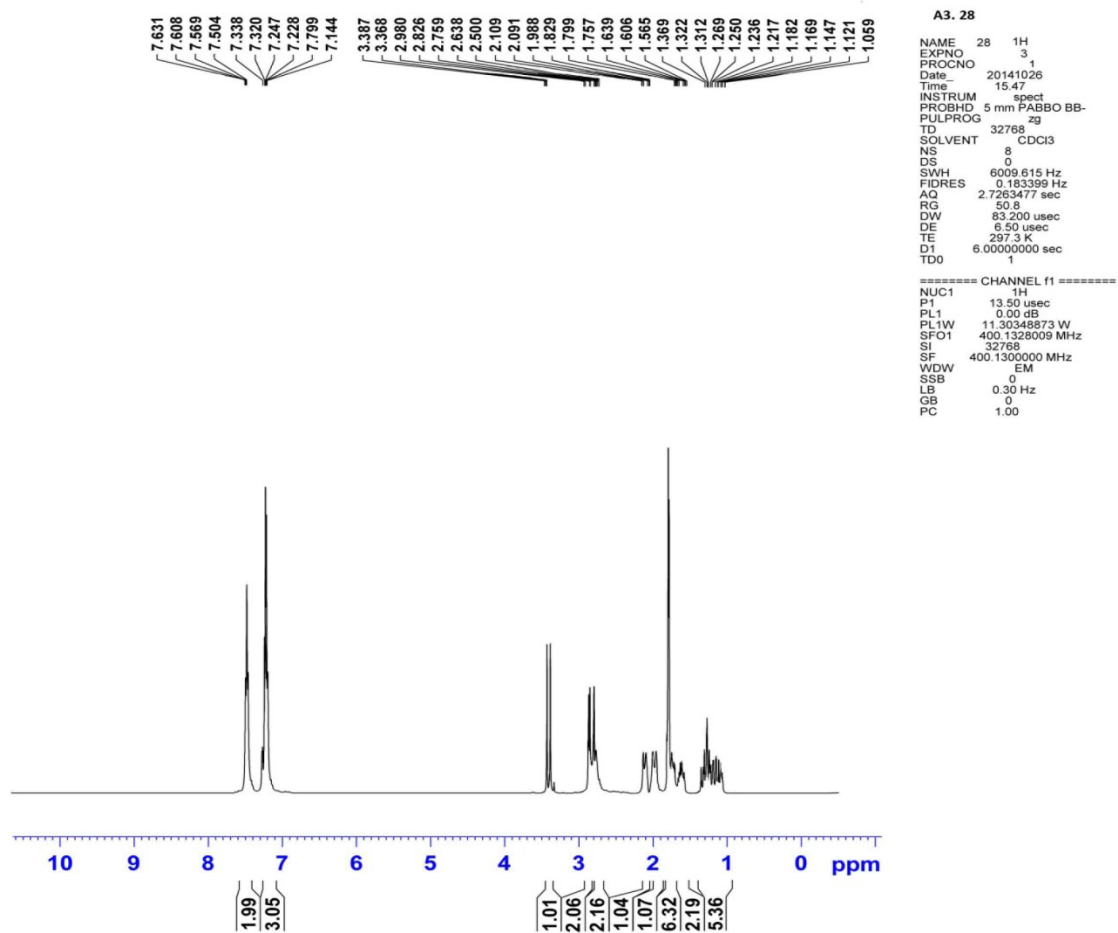

Figure 22 <sup>1</sup>H NMR, spectrum of (table 1, 6i)

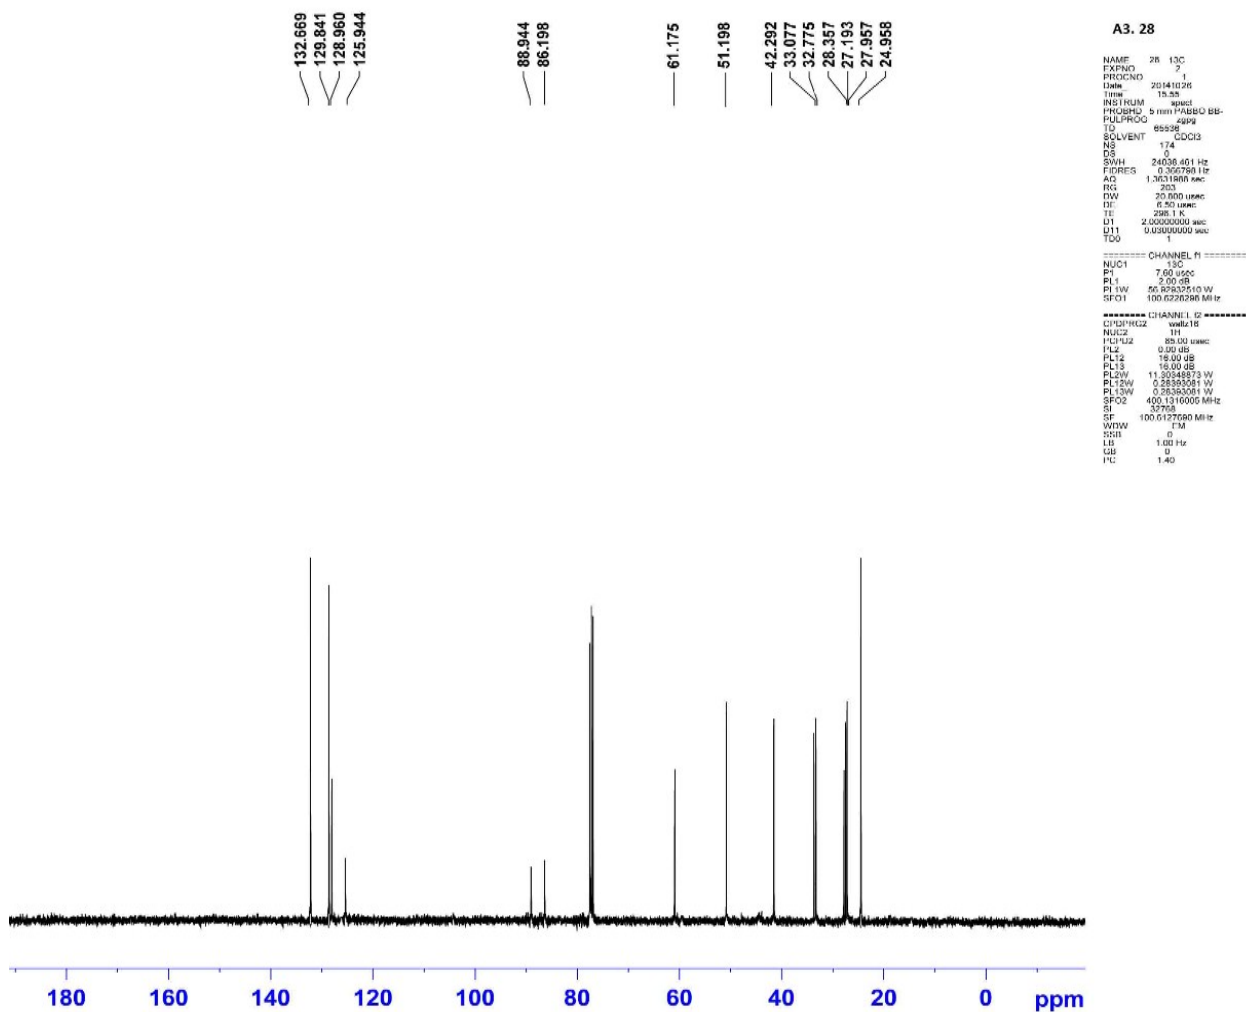

Figure 23 <sup>13</sup>C NMR, spectrum of (table 1, 6i)



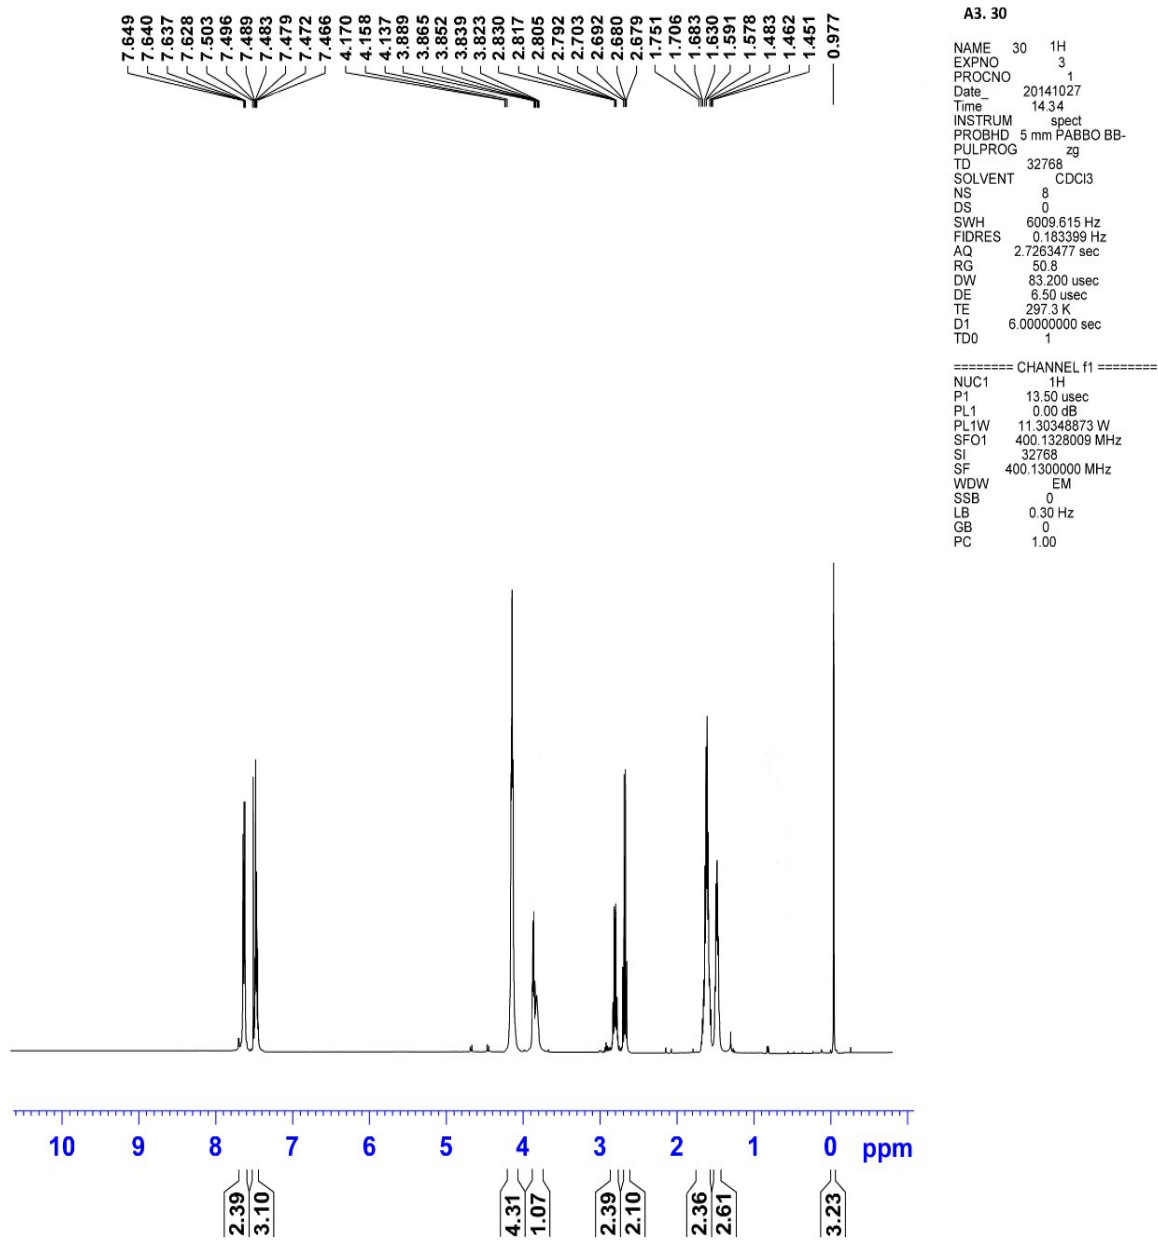

Figure 24  $^1\text{H}$  NMR, spectrum of (table 1, 6m)

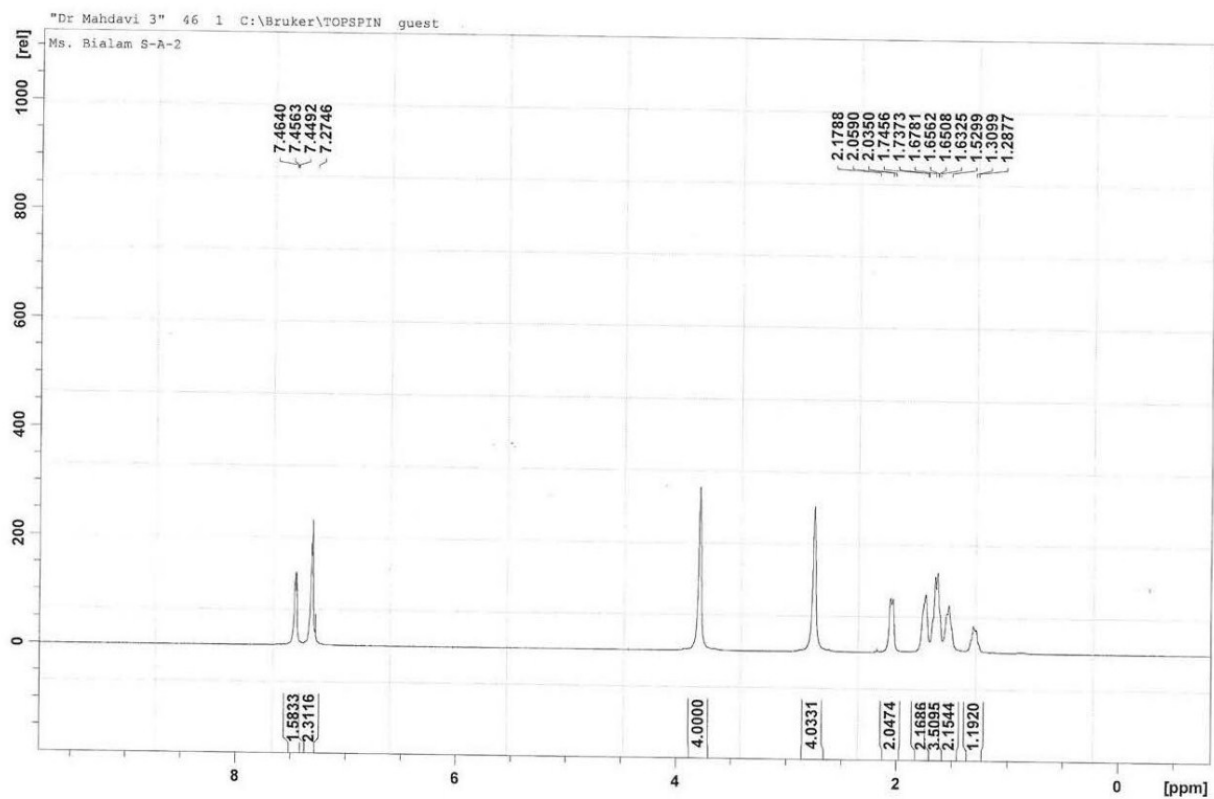

Figure 25  $^1\text{H}$  NMR, spectrum of (table 2, 8e)

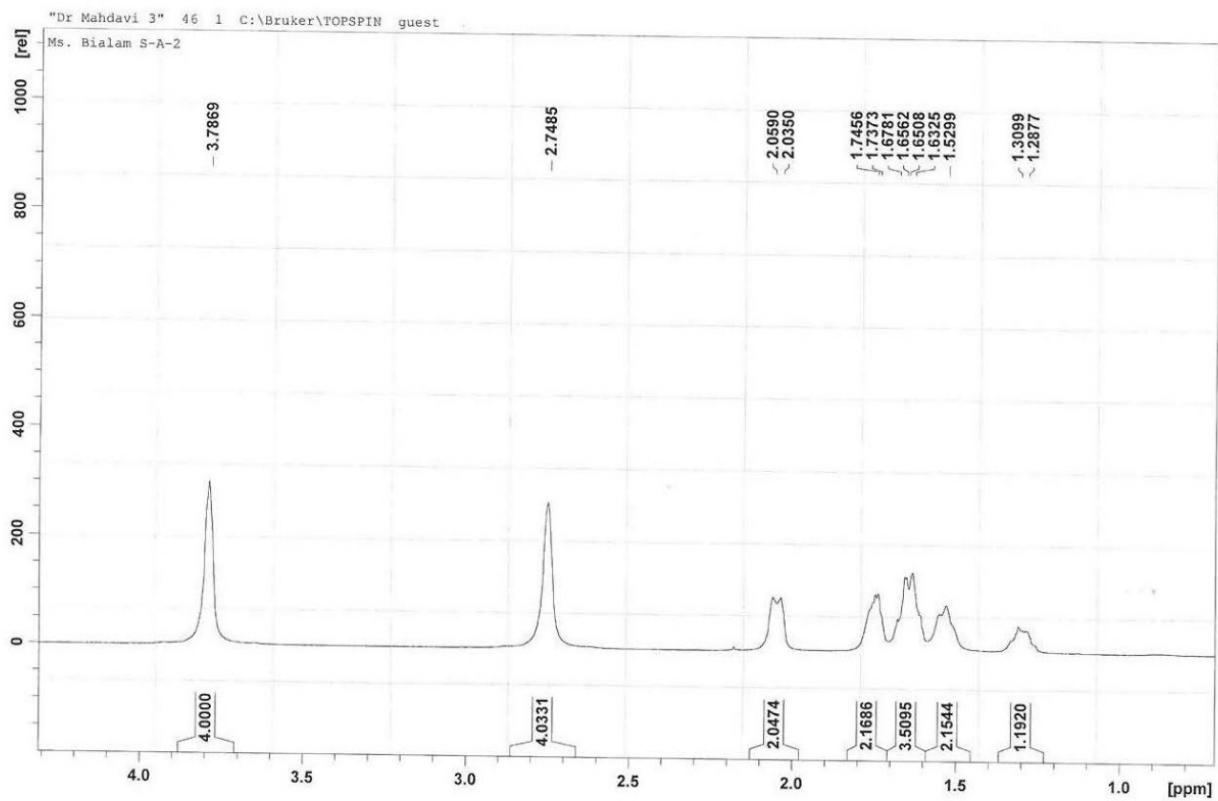

**Figure 26**  $^1\text{H}$  NMR, Expand spectrum of (table 2, 8c)

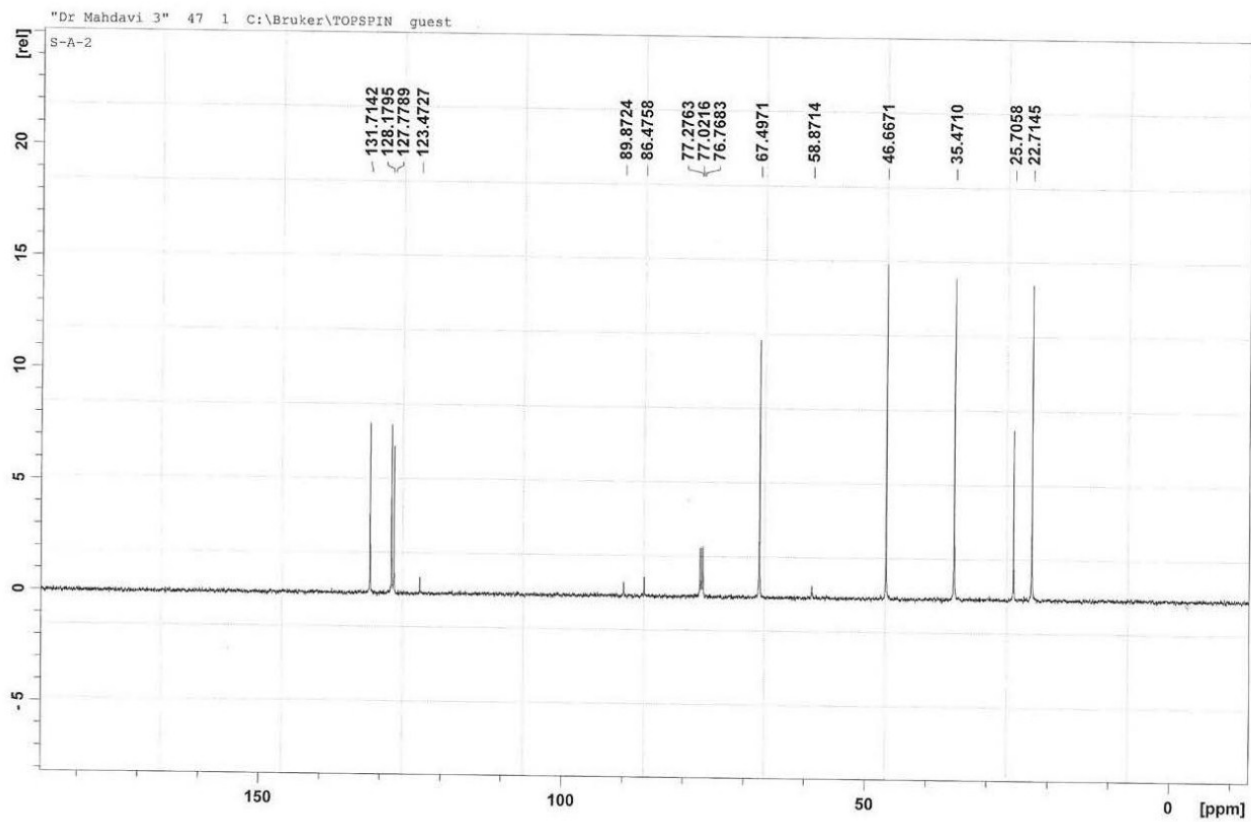

**Figure 27**  $^{13}\text{C}$  NMR, spectrum of (table 2, 8e)

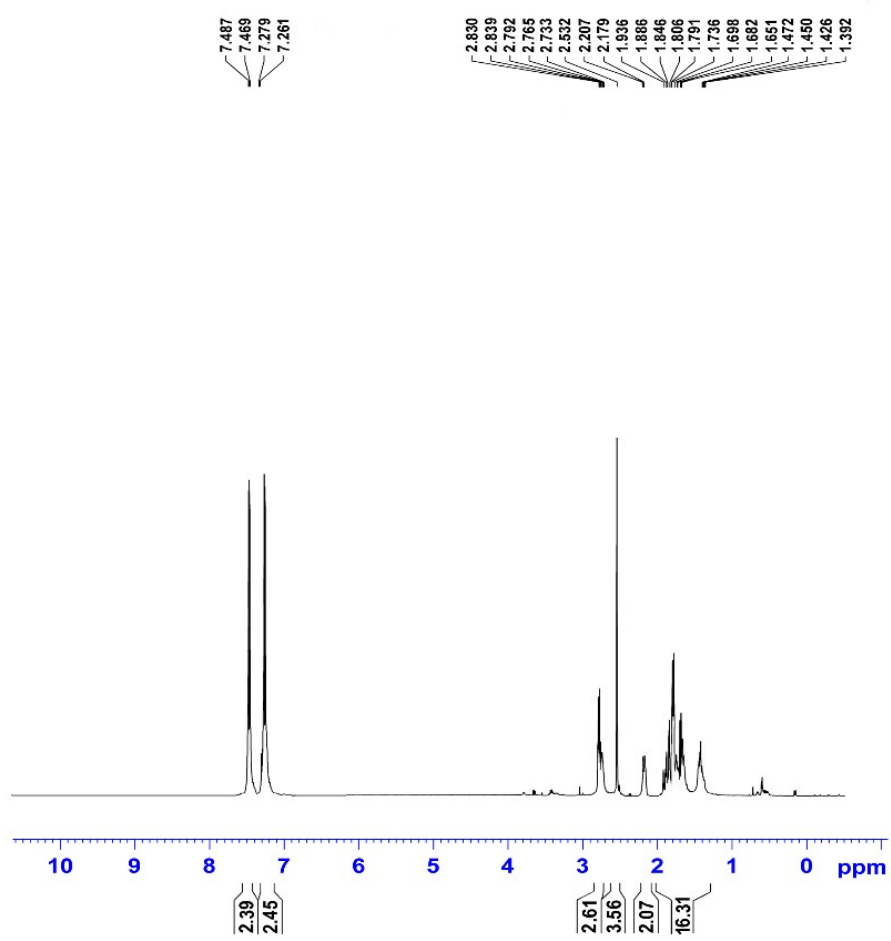

Figure 28 <sup>1</sup>H NMR, spectrum of (table 2, 8f)

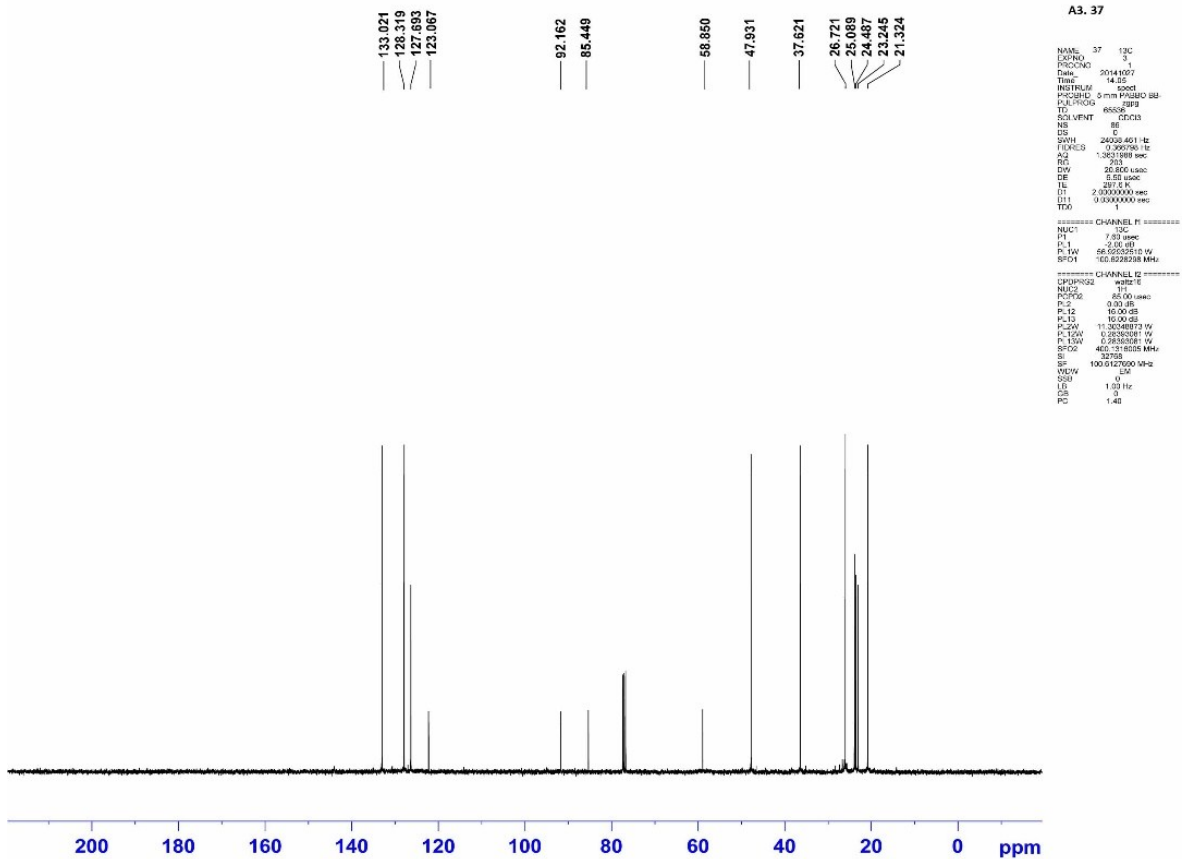

Figure 29 <sup>13</sup>C NMR, spectrum of (table 2, 8f)

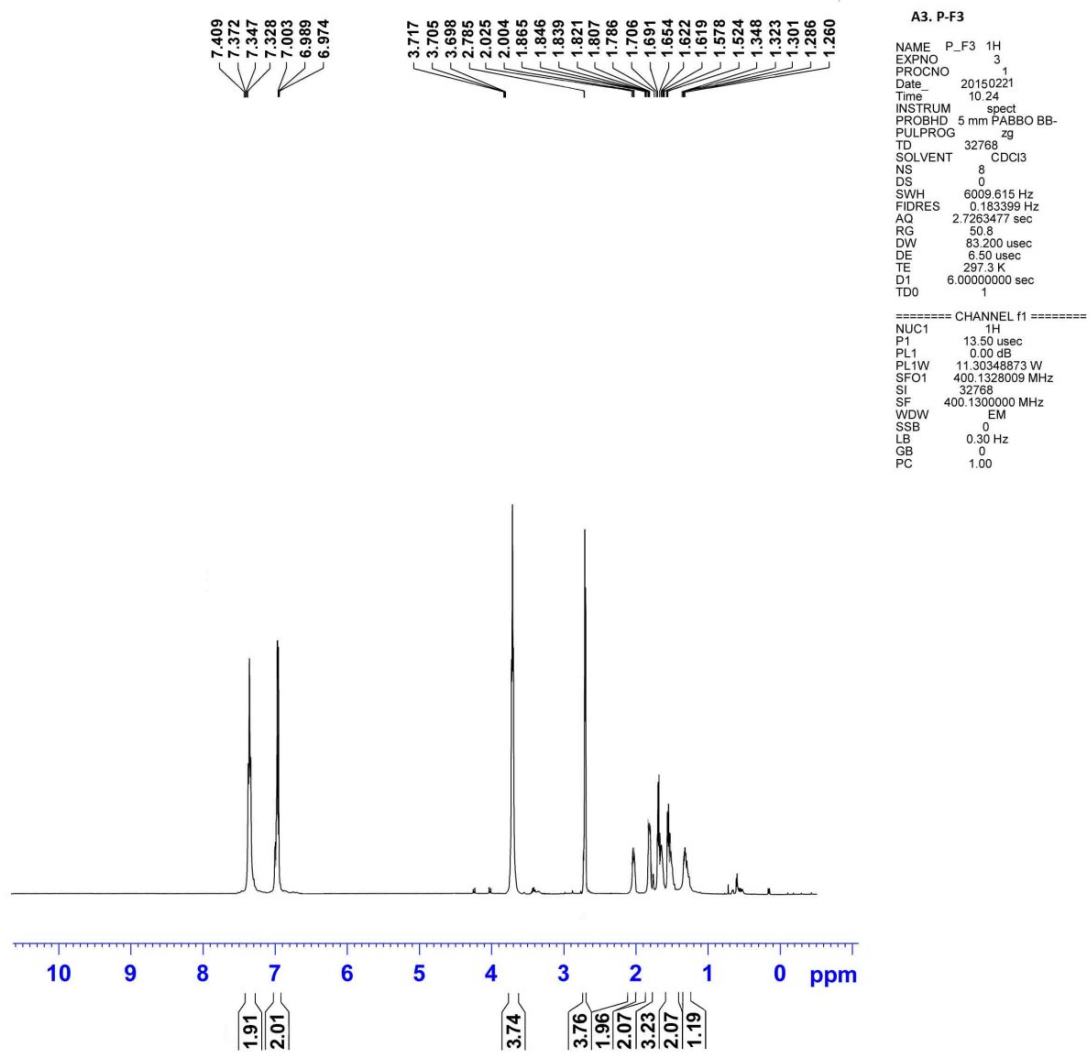

**Figure 30** <sup>1</sup>H NMR spectrum of (table 2, 8i)

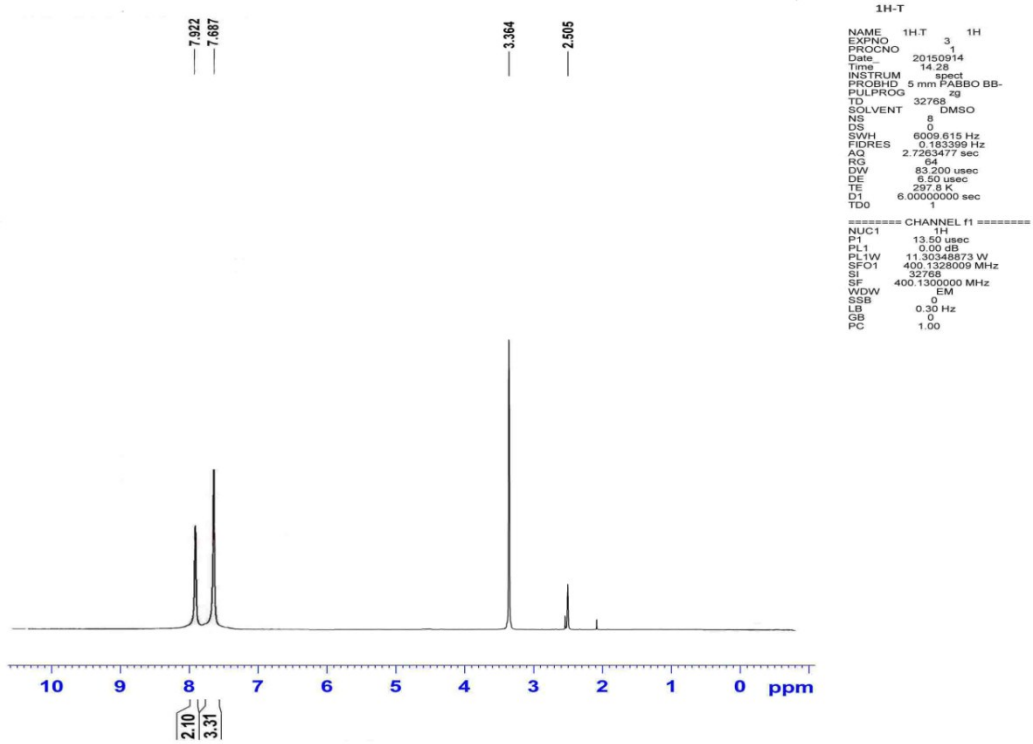

Figure 31 <sup>1</sup>H NMR spectrum of (table 3, 9a)



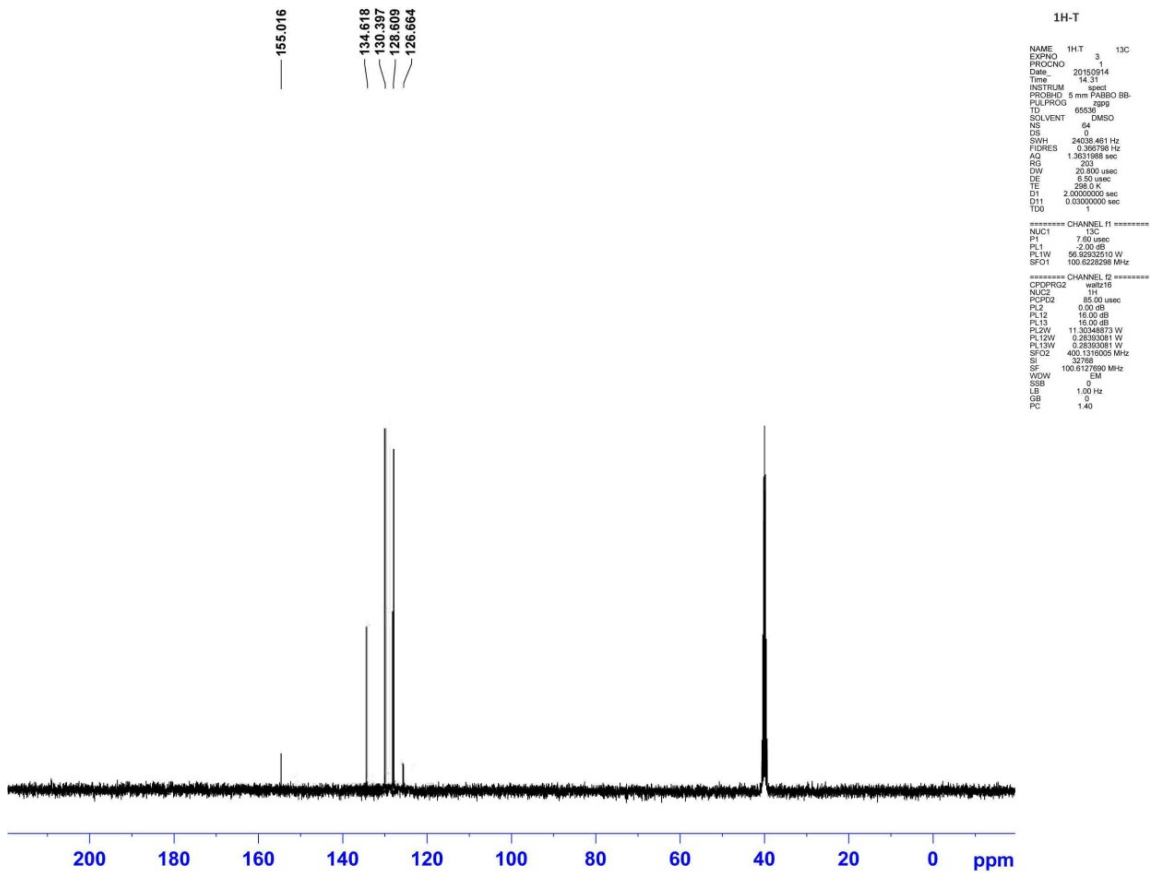

Figure 32  $^{13}\text{C}$  NMR spectrum of (table 3, 9a)

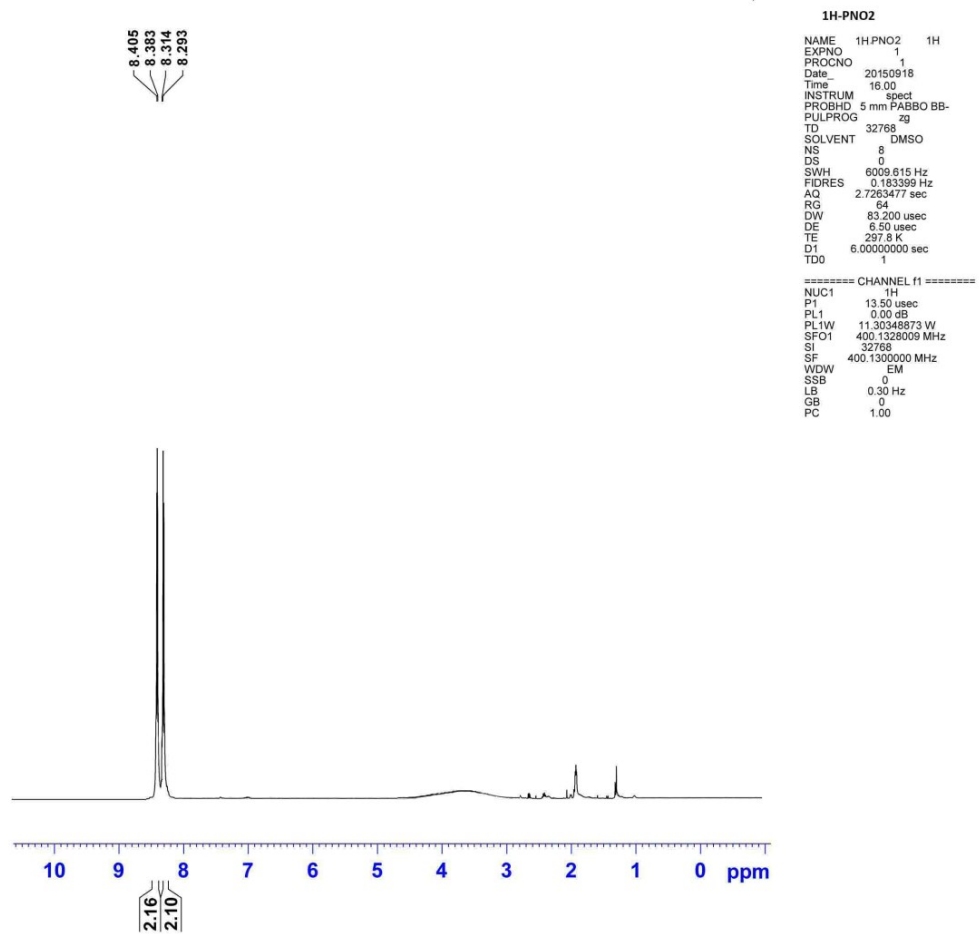

**Figure 33**  $^1\text{H}$  NMR spectrum of compound (table 3, 9b)

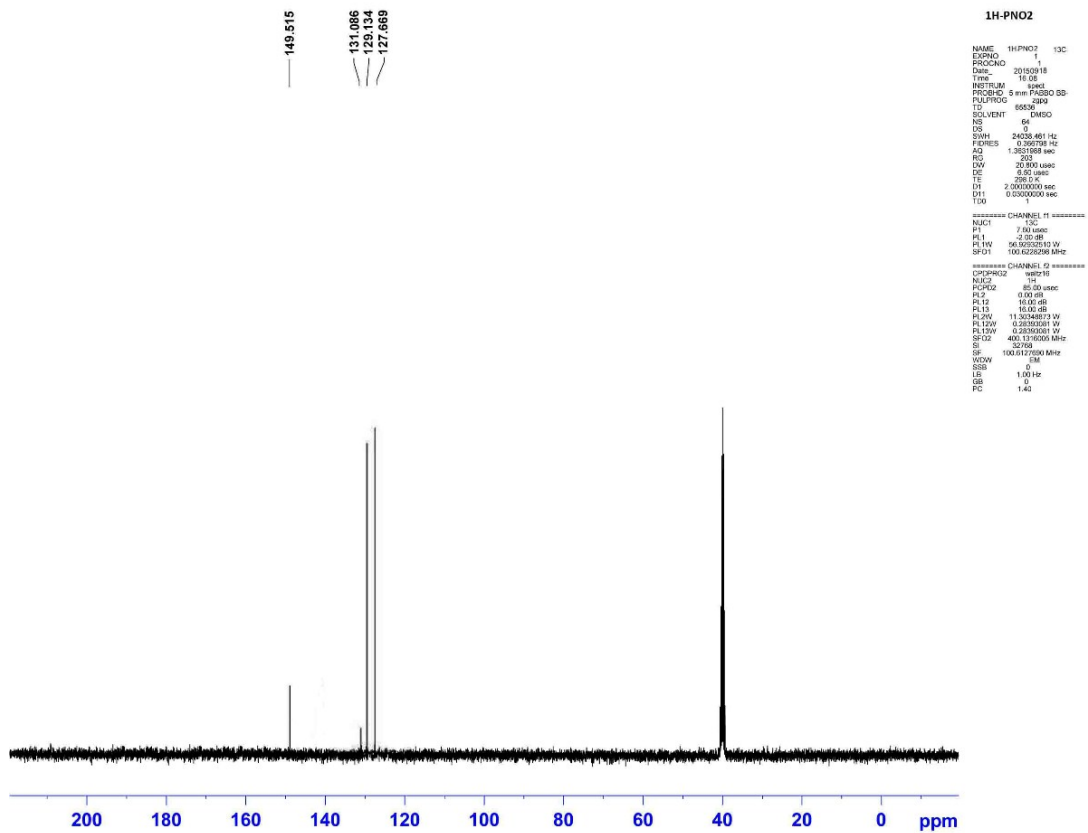

Figure 34  $^{13}\text{C}$  NMR spectrum of (table 3, 9b)

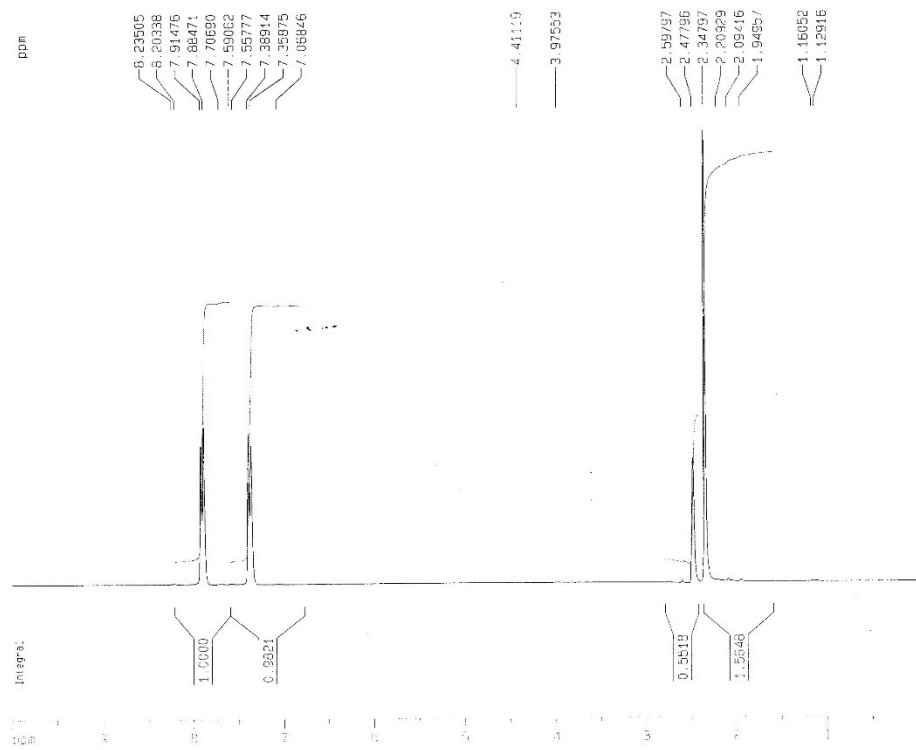

**Figure 35**  $^1\text{H}$  NMR spectrum of (table 3, 9c)

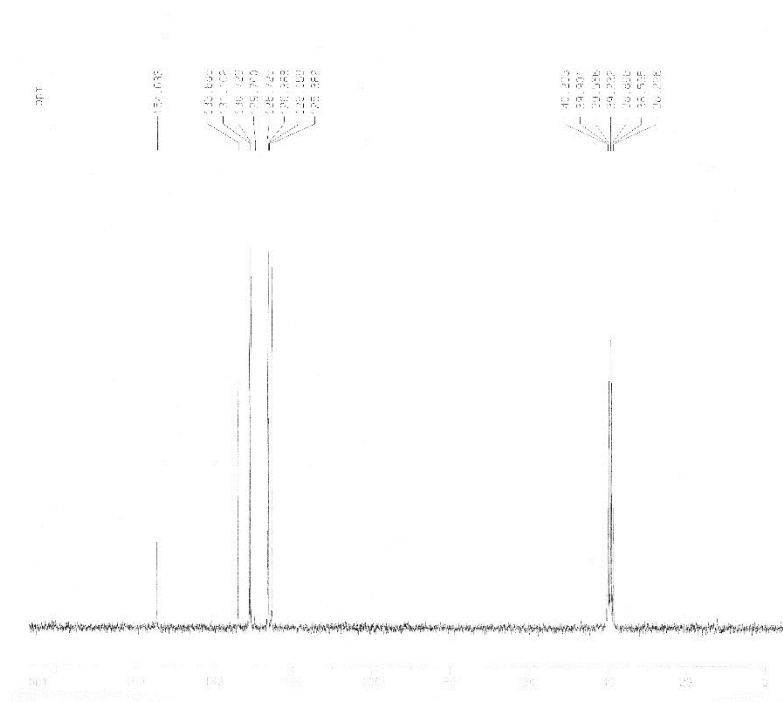

**Figure 36**  $^{13}\text{C}$  NMR spectrum of (table 3, 9c)

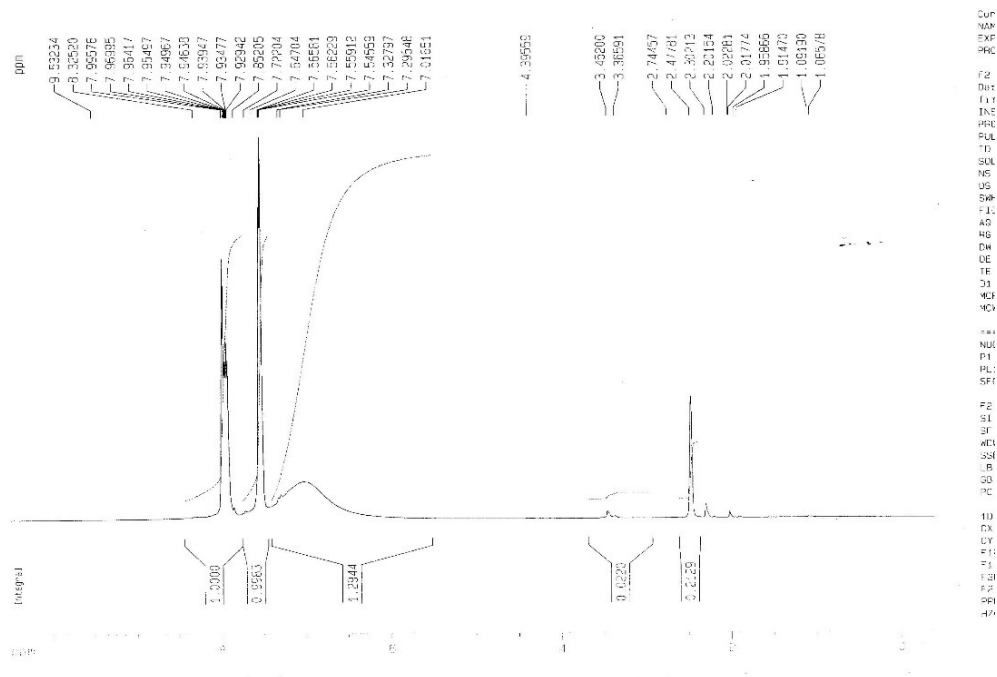

Figure 37  $^1\text{H}$  NMR spectrum of (table 3, 9g)

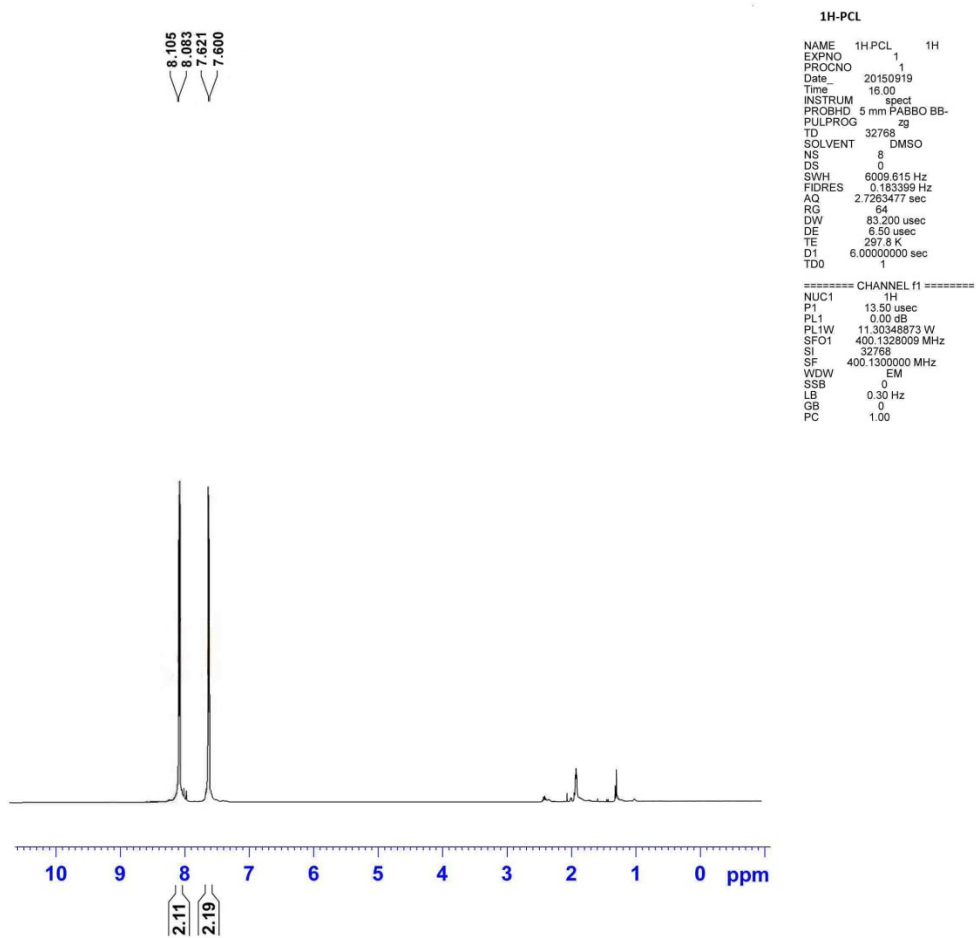

**Figure 38**  $^1\text{H}$  NMR spectrum of (table 3, 9h)

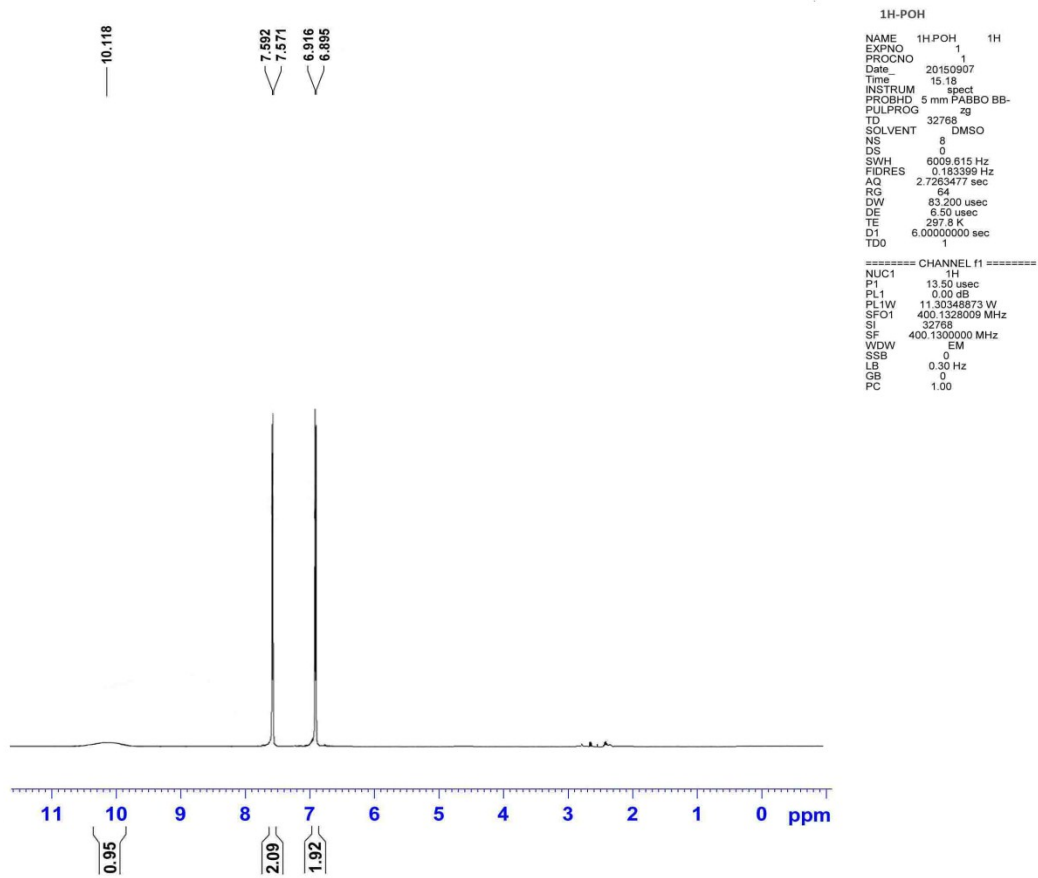

**Figure 39**  $^1\text{H}$  NMR spectrum of (table 3, 9j)



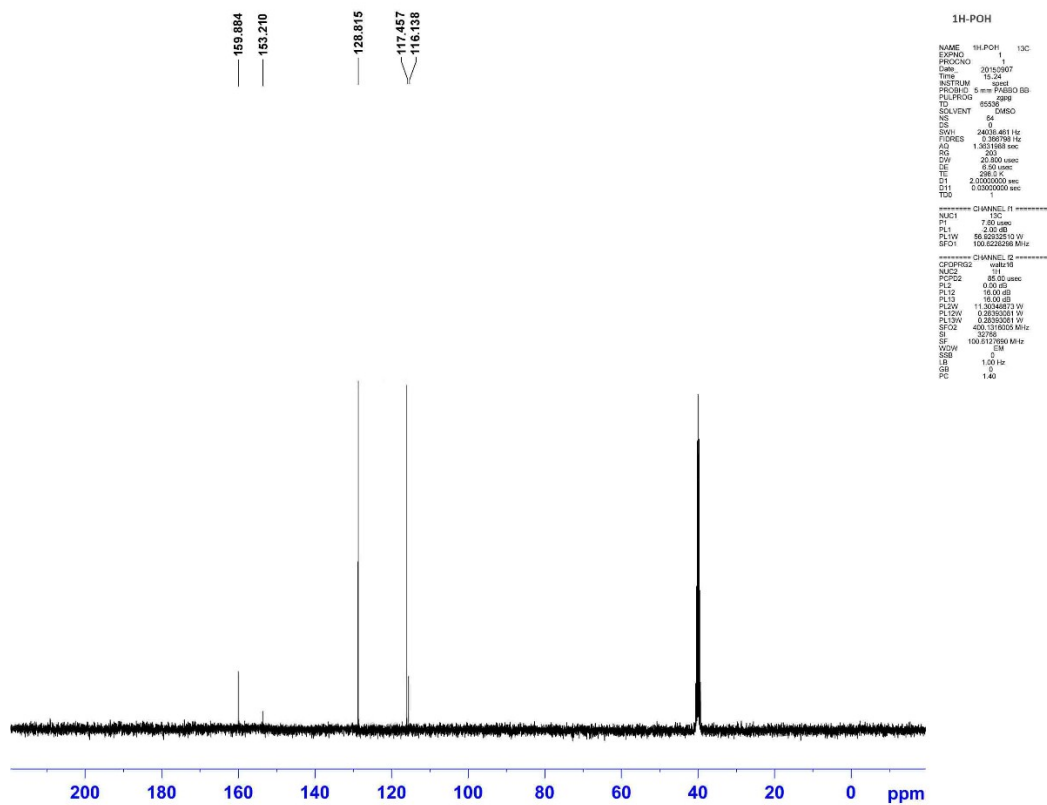

Figure 40  $^{13}\text{C}$  NMR spectrum of (table 3, 9j)

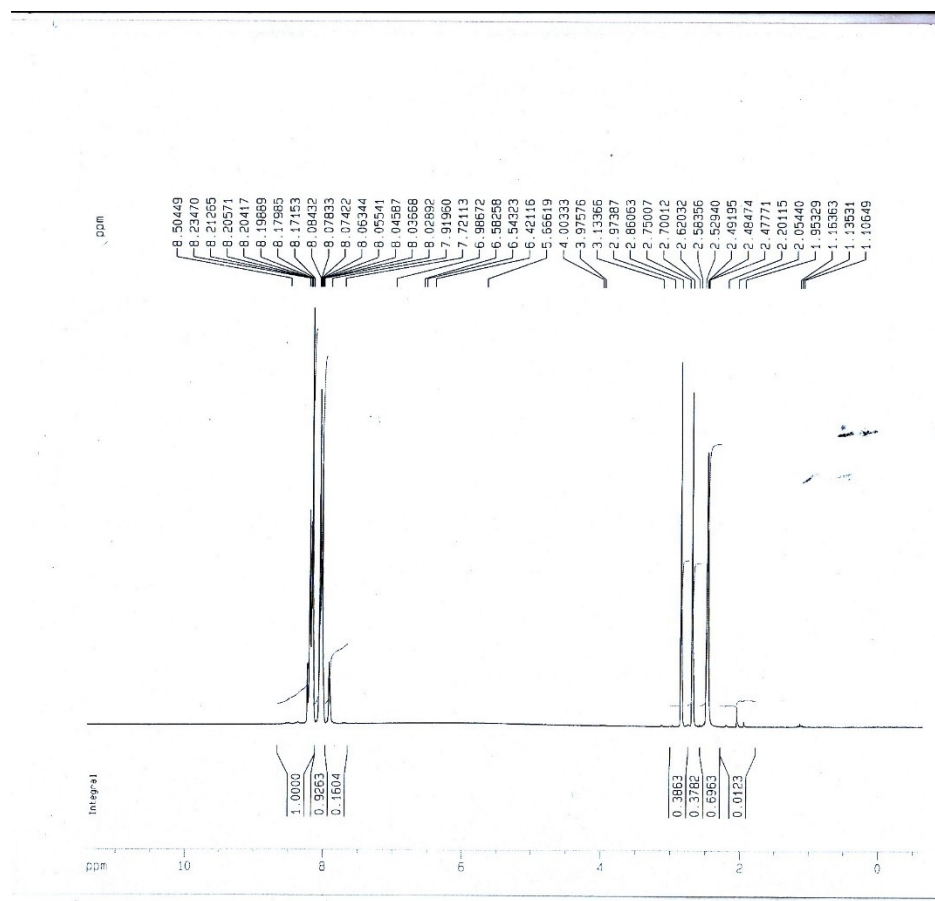

**Figure 41**  $^1\text{H}$  NMR spectrum of (table 3, 9k)

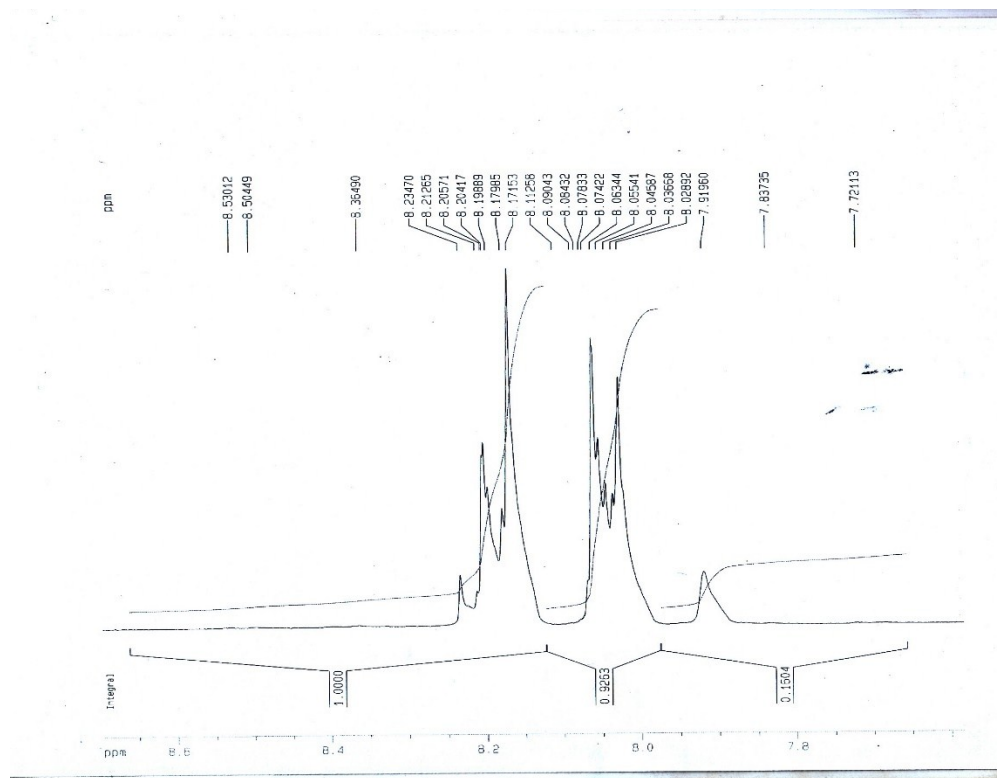

**Figure 42**  $^1\text{H}$  NMR expand spectrum of (table 3, 9k)

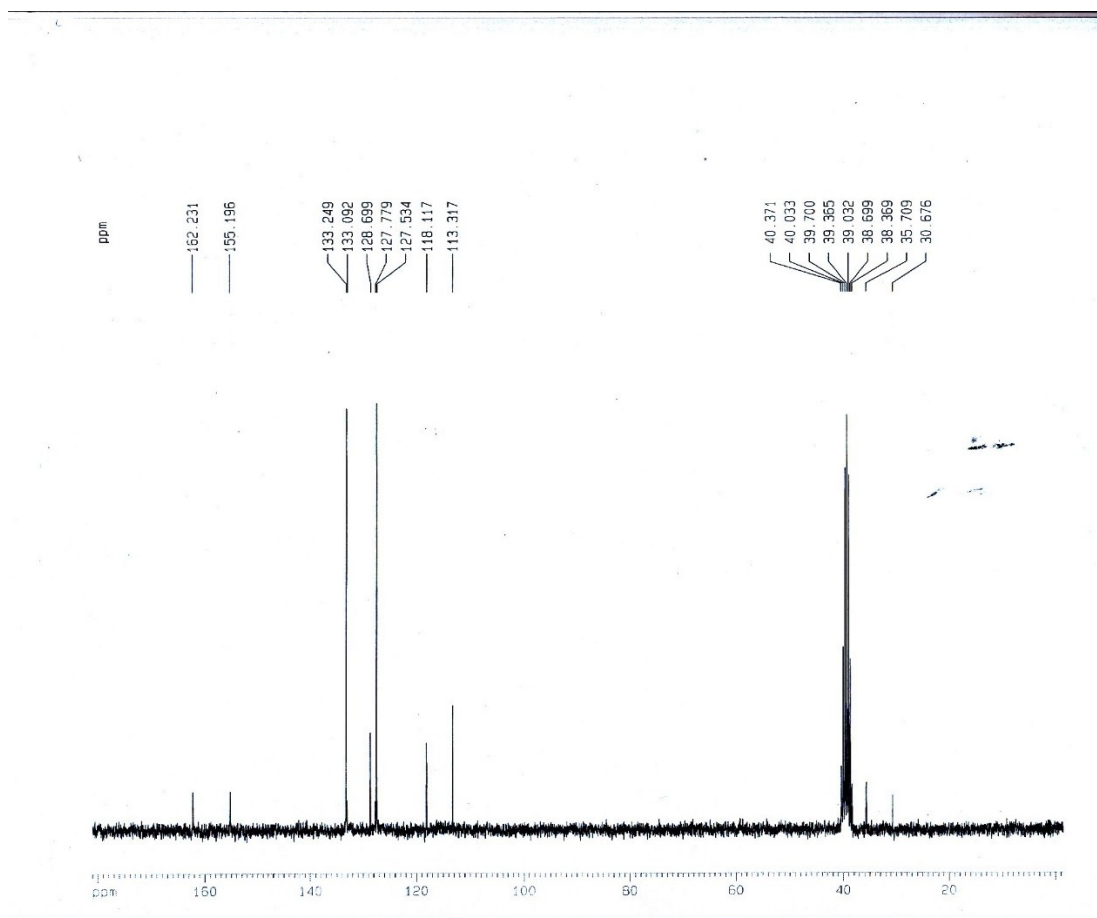

**Figure 43**  $^{13}\text{C}$  NMR spectrum of (table 3, 9k)

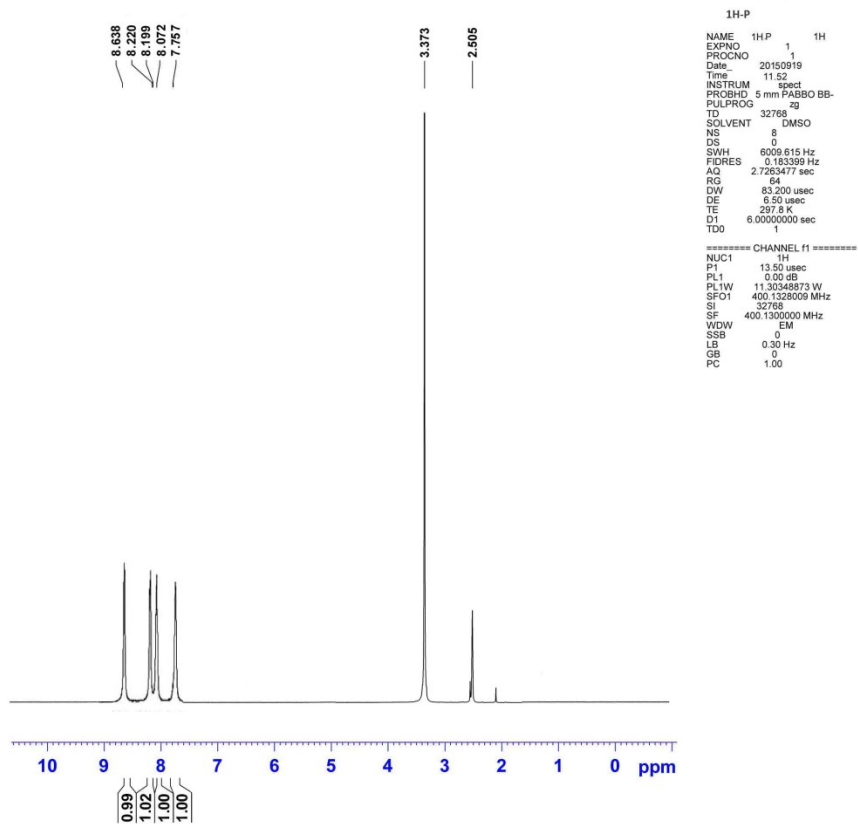

**Figure 44**  $^1\text{H}$  NMR spectrum of (table 3, 9I)

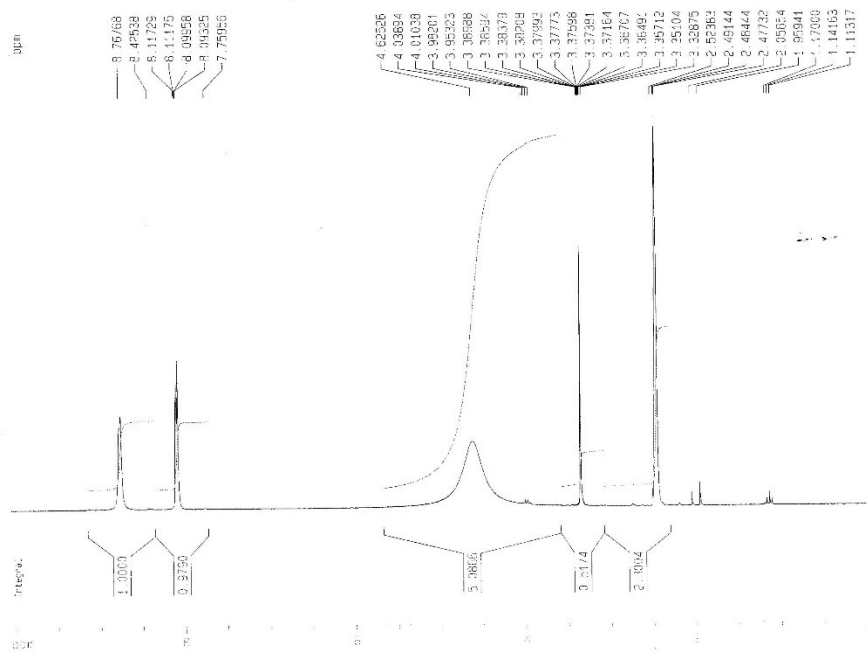

Figure 45  $^1\text{H}$  NMR spectrum of (table 3, 9m)

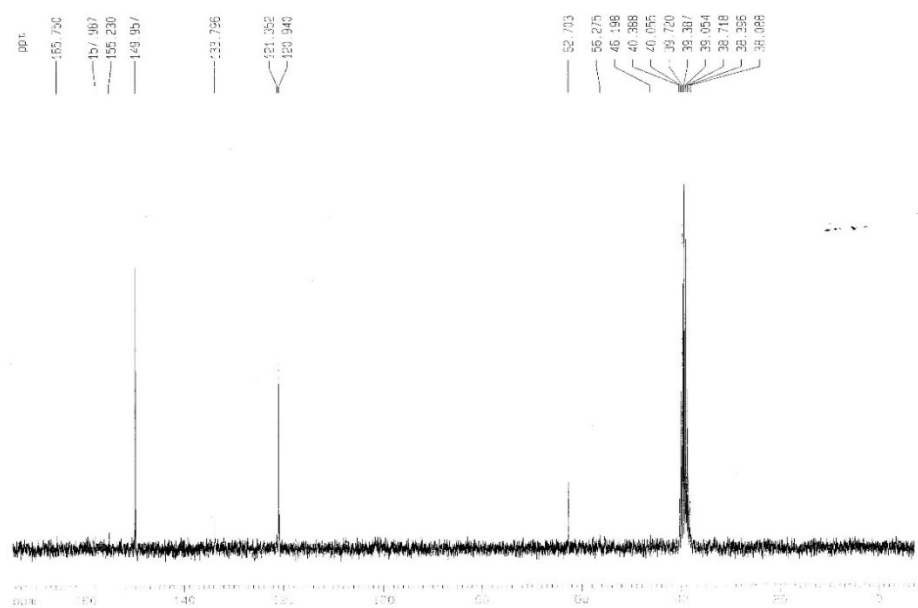

**Figure 46**  $^{13}\text{C}$  NMR spectrum of (table 3, 9m)

#### 4. References

1. M. Tajbakhsh, M. Farhang, M. Baghbanian, R. Hosseinzadeh and M. Tajbakhsh, *New J. Chem.*, 2015, **39**, 1827.
2. G. A. Meshrama, S. S. Deshpandea, P. A. Wagha and V. A. Vala, *Tetrahedron Lett.*, 2014, **4**, 101.
3. A. Khalafi-Nezhad and S. Mohammadi, *RSC Adv.*, 2013, **3**, 4362.
4. A. I. Azath, P. Suresh and K. Pitchumani, *New J. Chem.*, 2012, **36**, 2334.
5. V. Rama, K. Kanagaraj and K. Pitchumani *J. Org. Chem.*, 2011, **76**, 9090.
6. M. Esmailpour, J. Javidi, F. Nowroozi Dodeji and M. Mokhtari Abarghoui, *J. Mol. Catal. A: chem.*, 2014, **393**, 18.
